# Supplementary material for: Evaluation of variation in preclinical electroencephalographic (EEG) spectral power across multiple laboratories and experiments: An EQIPD study
Source: PubMed Central journal article supplement (PMC11521305; doi:10.1371/journal.pone.0309521), 2024-10-29

# Absolute Delta (1-3.9 Hz) Power

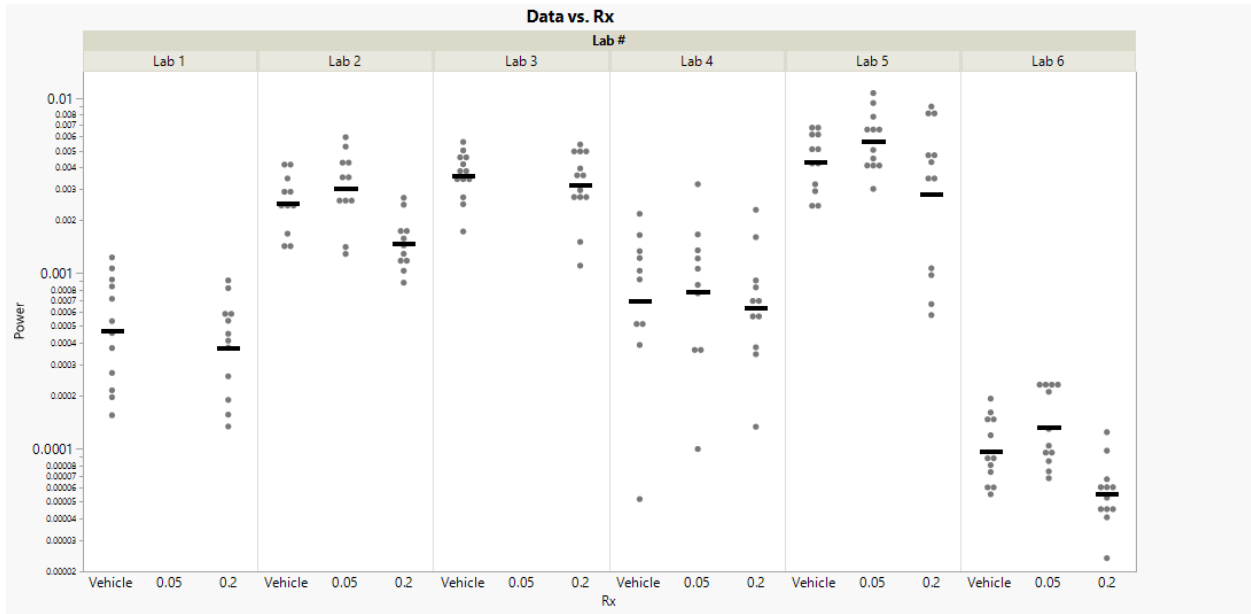

## Absolute Theta-1 (4-5.9 Hz) Power

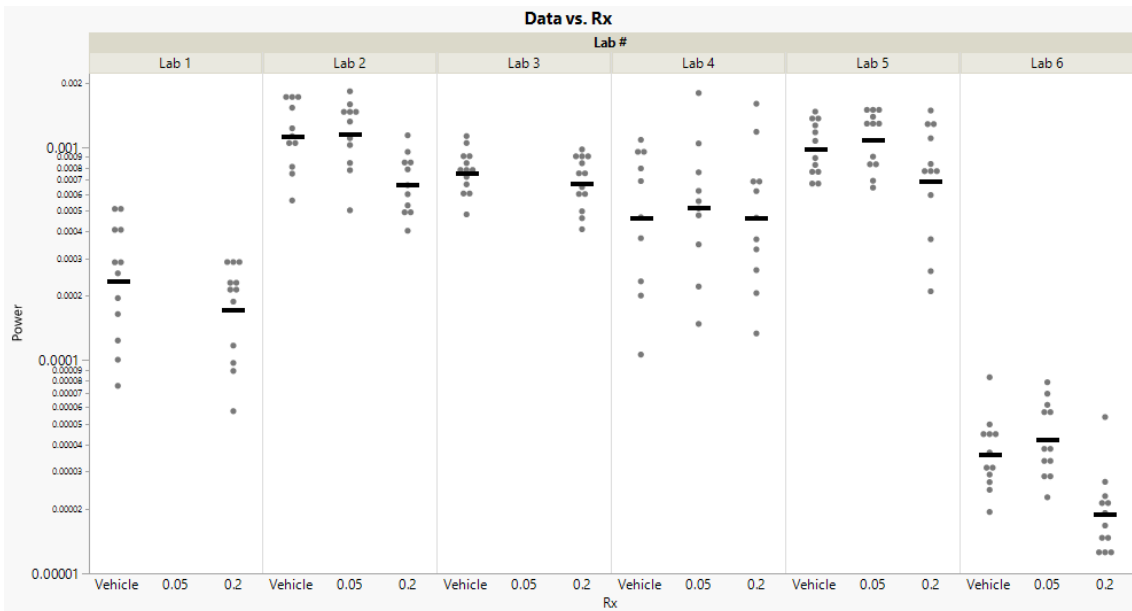

## Absolute Theta-2 (6-7.9 Hz) Power

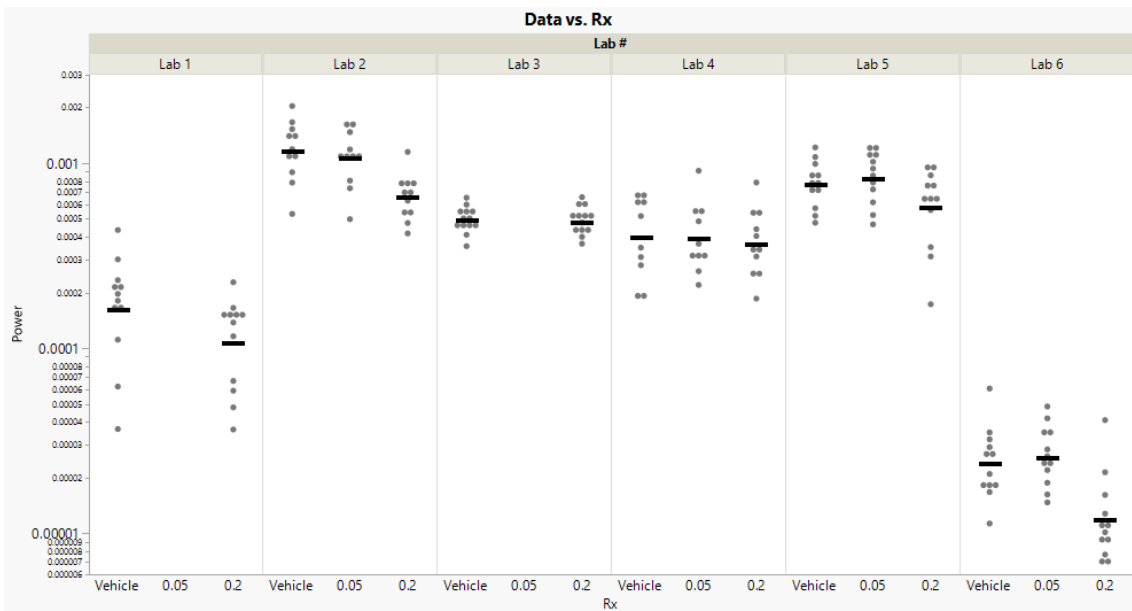

## Absolute Alpha-1 (8-10.9 Hz) Power

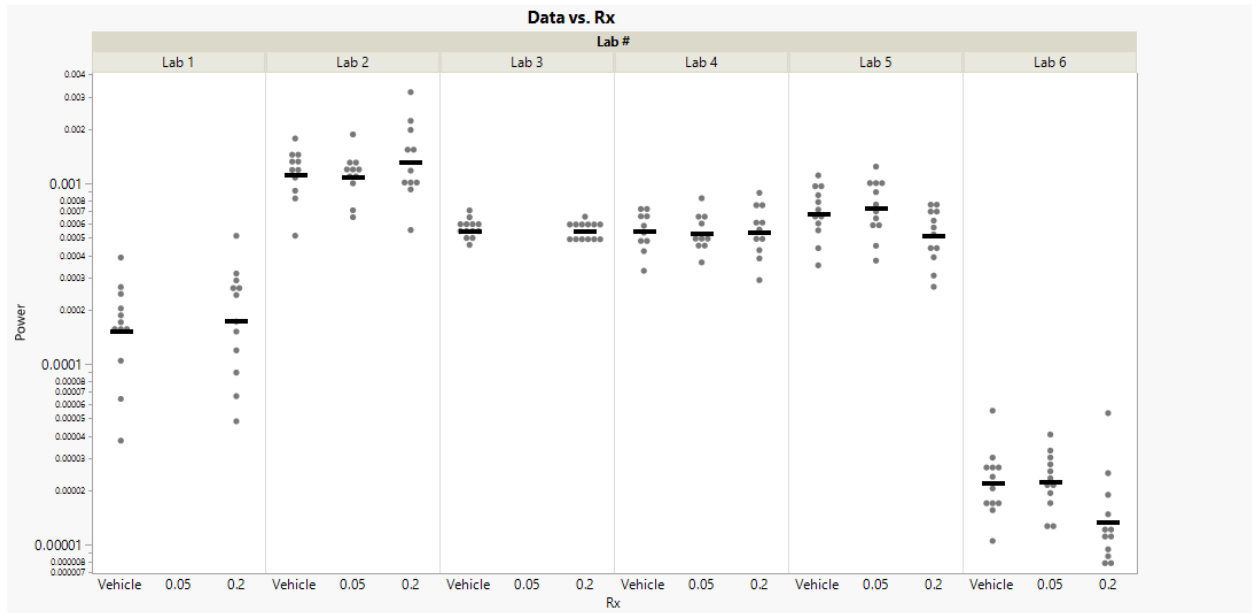

## Absolute Alpha-2 (11-13.9 Hz) Power

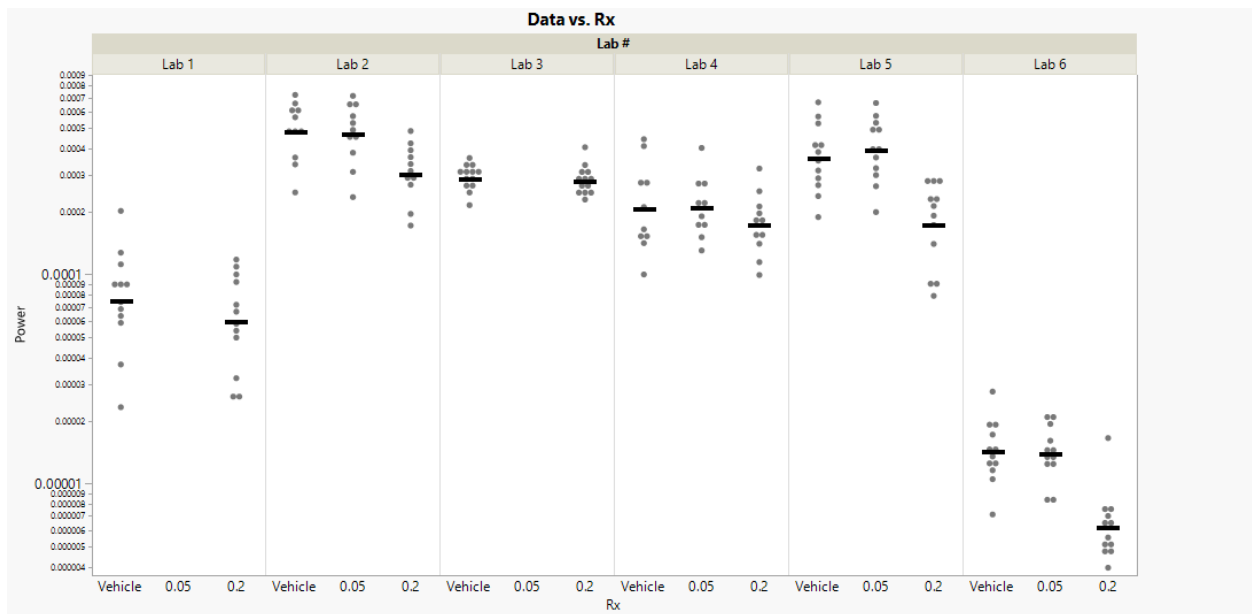

## Absolute Beta-1 (14-17.9 Hz) Power

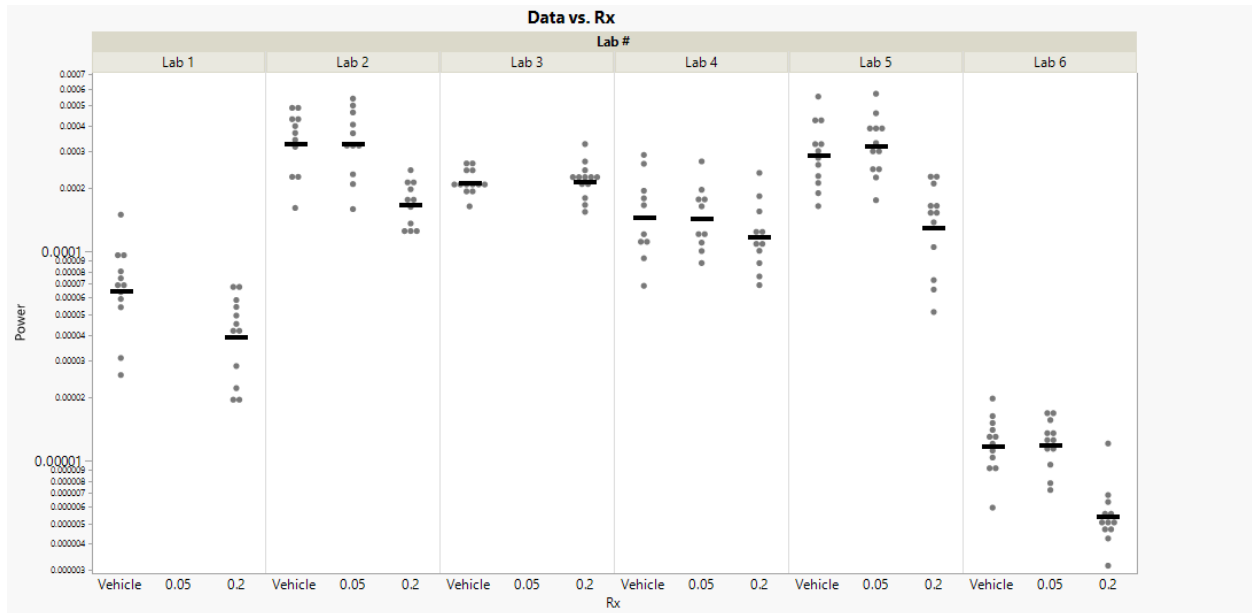

## Absolute Beta-2 (18-31.9 Hz) Power

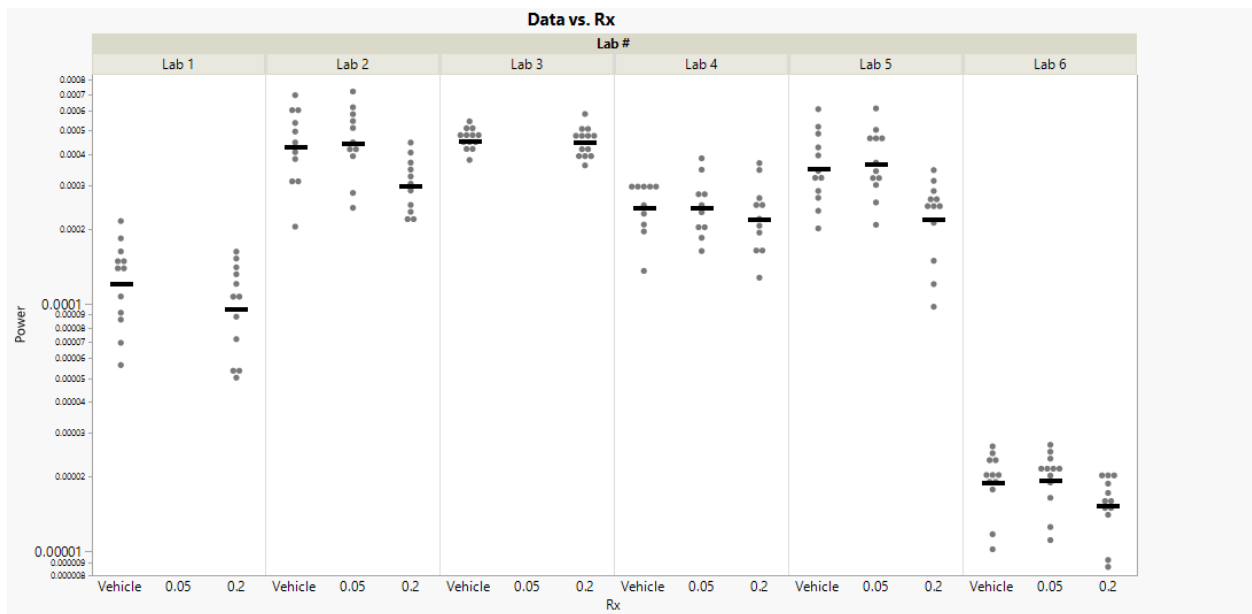

# Absolute Gamma-1 (32-48 Hz) Power

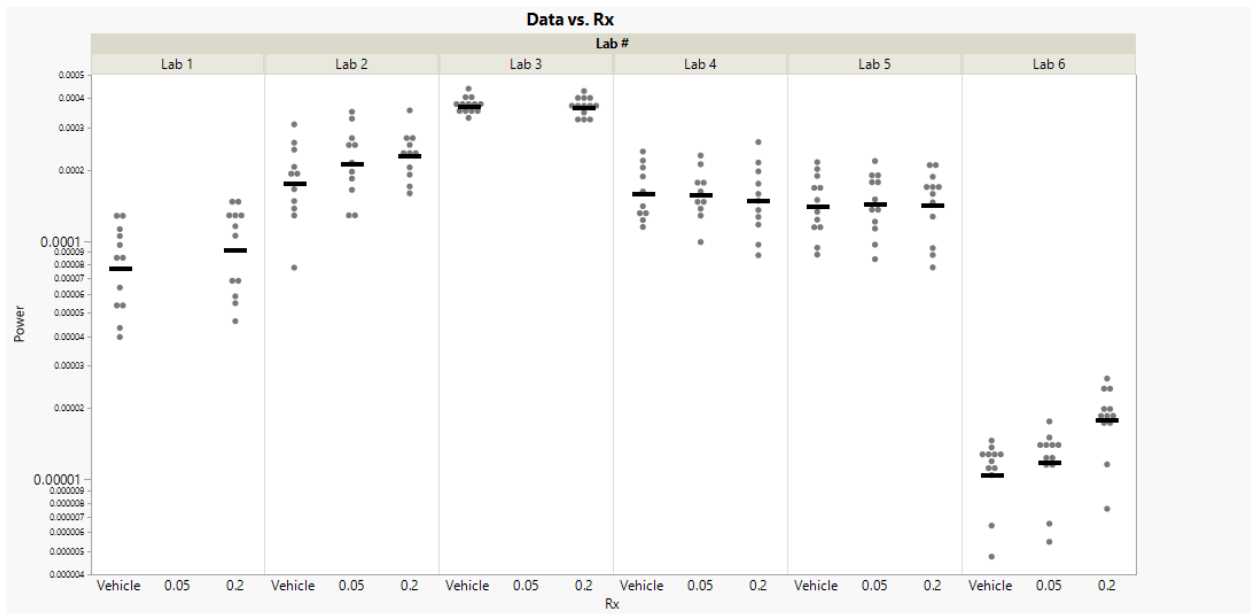

# Relative Delta (1-3.9 Hz) Power

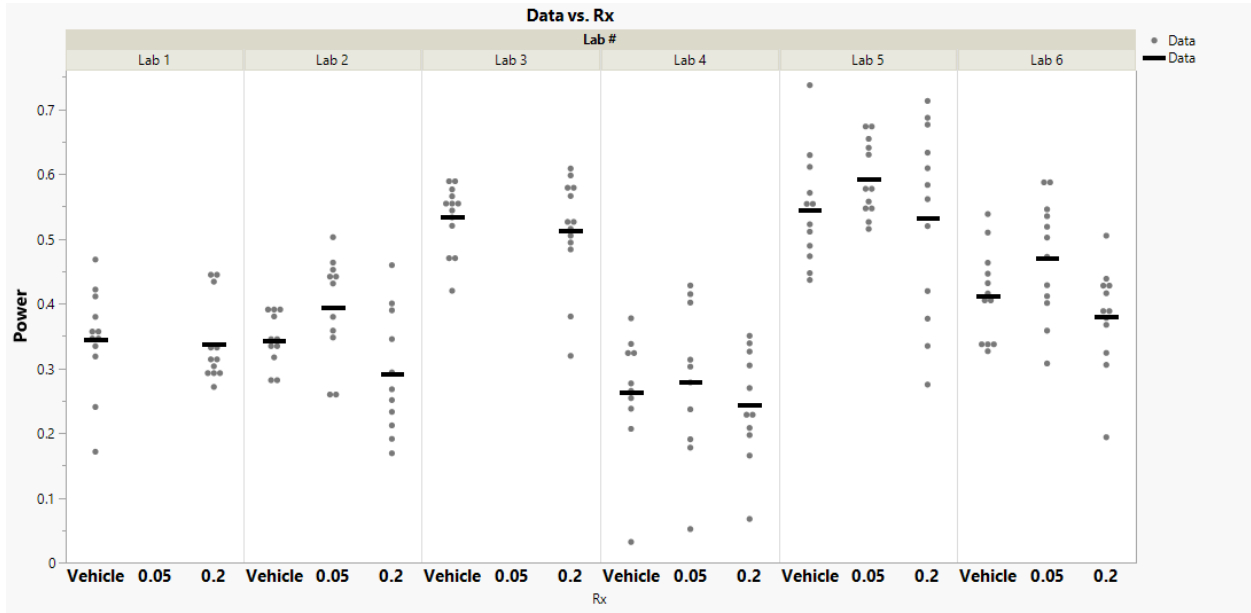

## Relative Theta-1 (4-5.9 Hz) Power

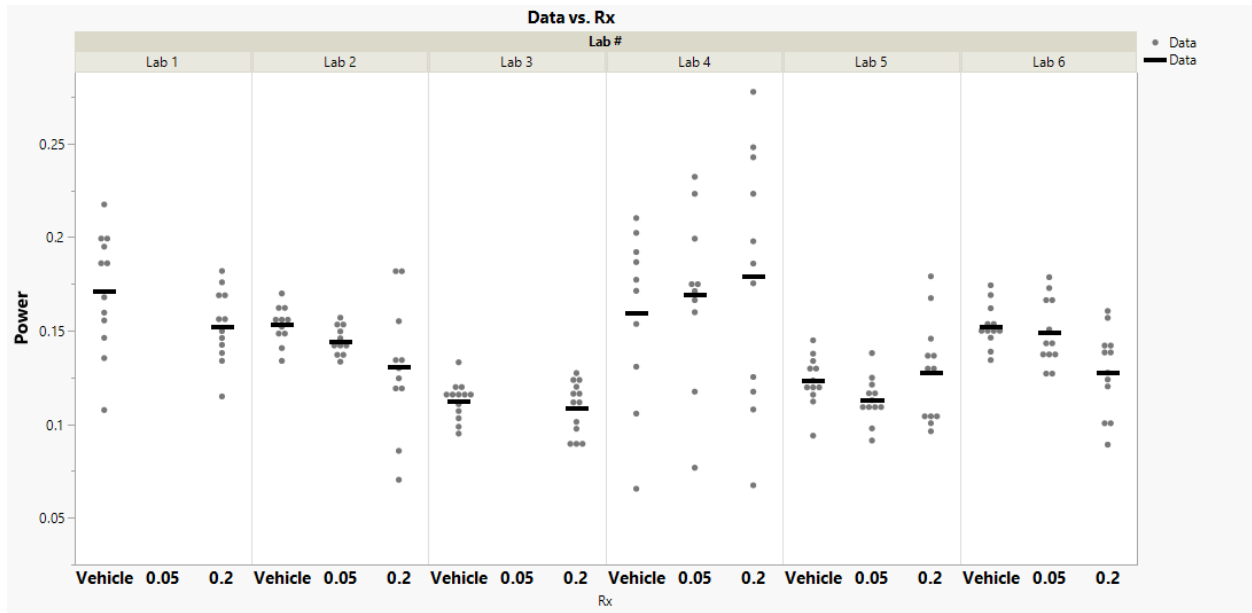

## Relative Theta-2 (6-7.9 Hz) Power

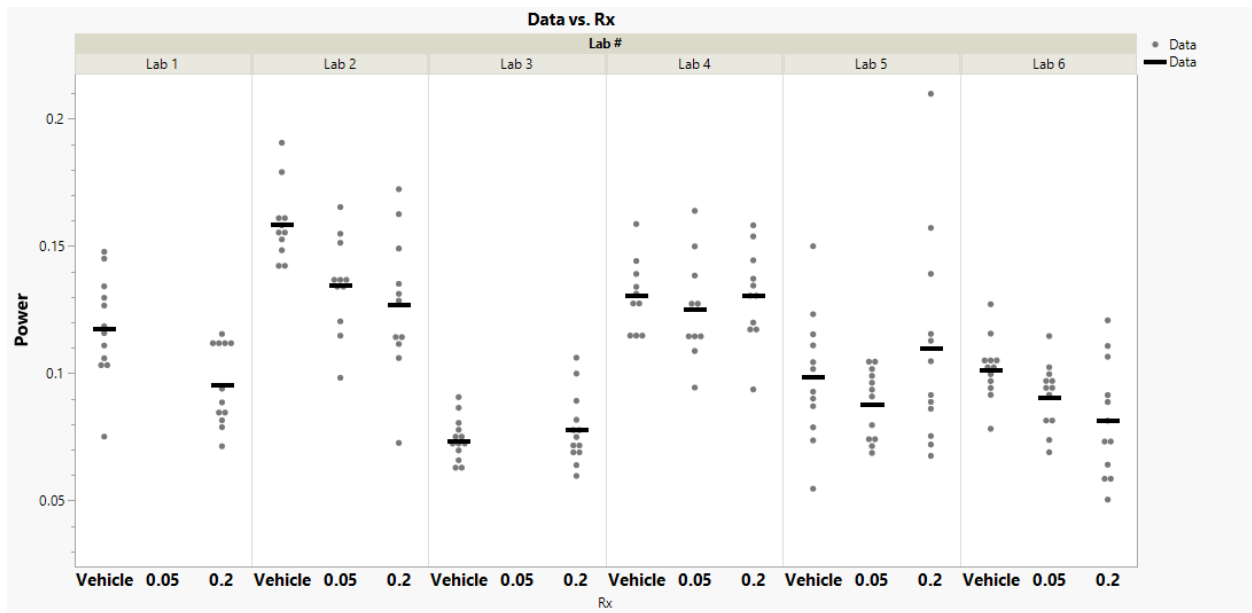

## Relative Alpha-1 (8-10.9 Hz) Power

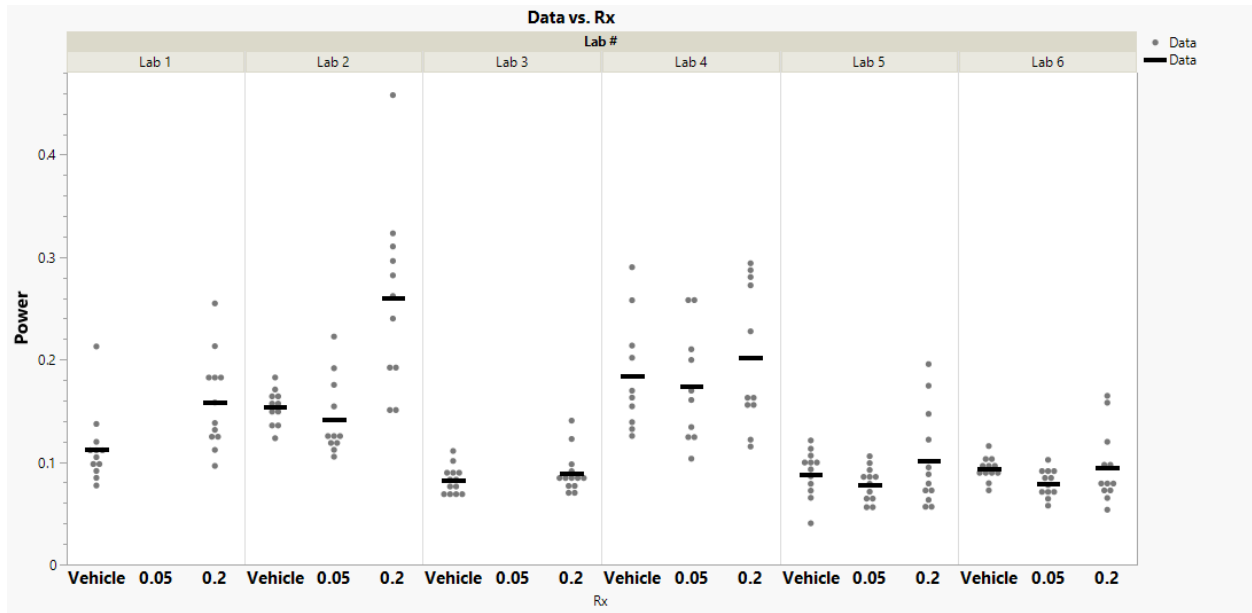

## Relative Alpha-2 (11-13.9 Hz) Power

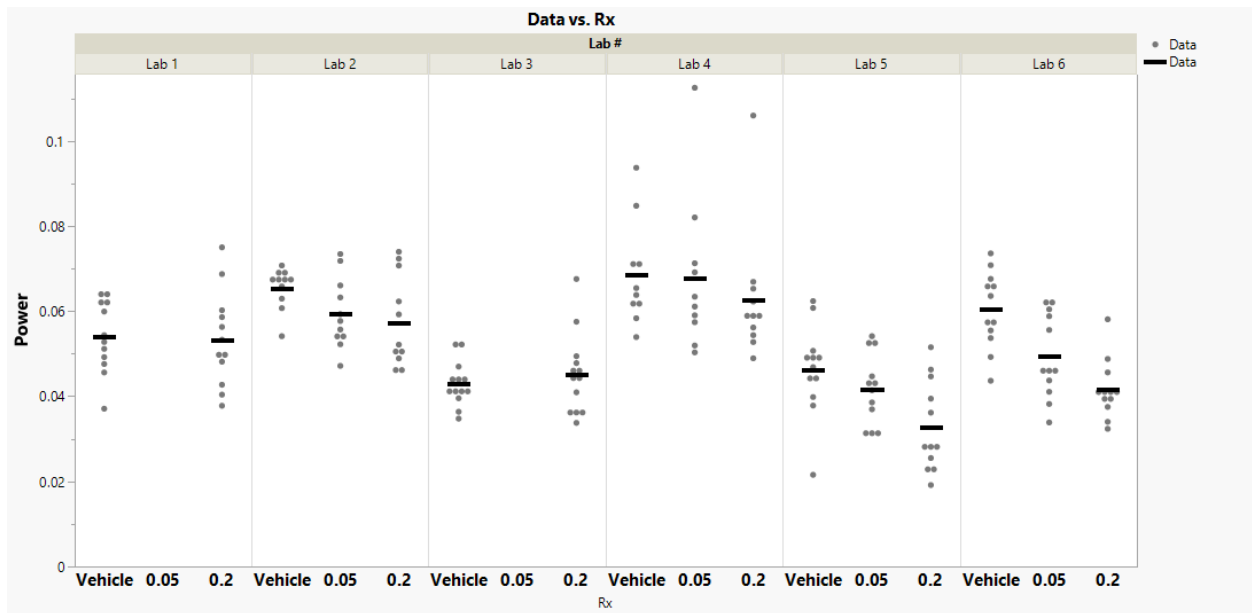



## Relative Beta-1 (14-17.9 Hz) Power

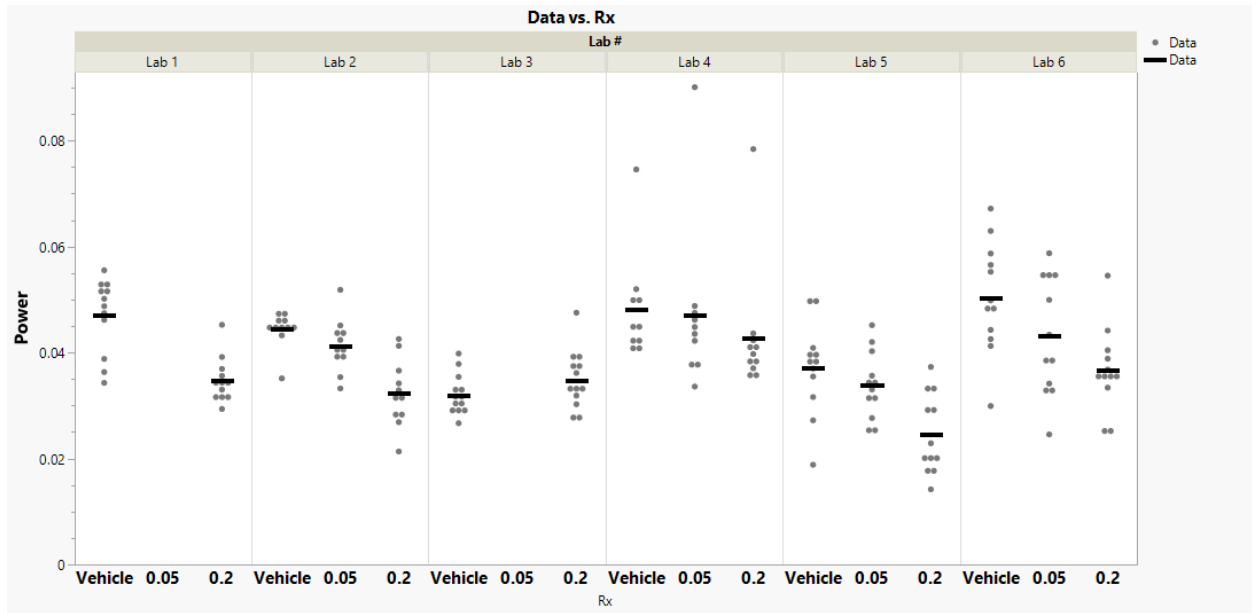

## Relative Beta-2 (18-31.9 Hz) Power

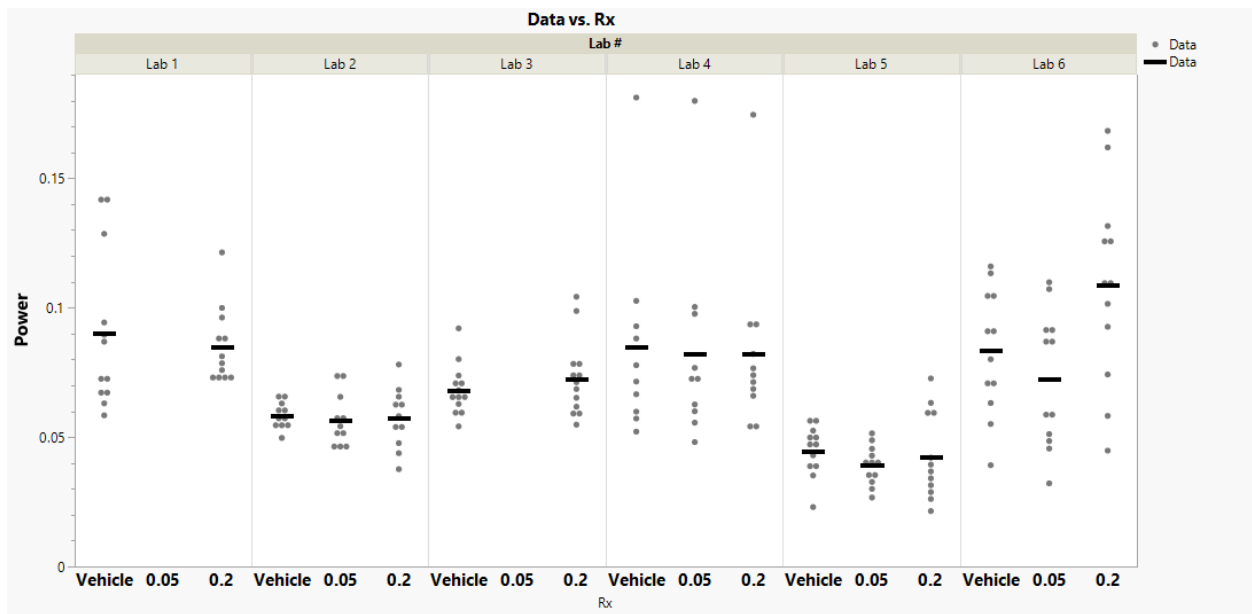

# Relative Gamma (32-48 Hz) Power

Note this is the same as Figure 16.

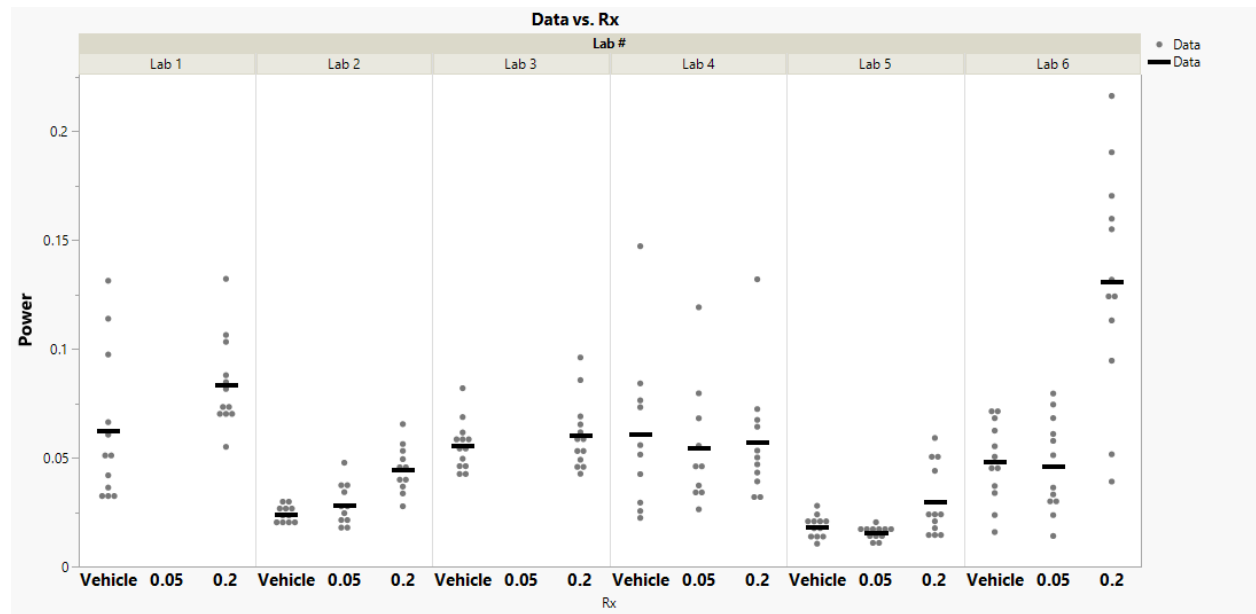

# Percent Change from Baseline using Absolute Delta (1-3.9 Hz) Power

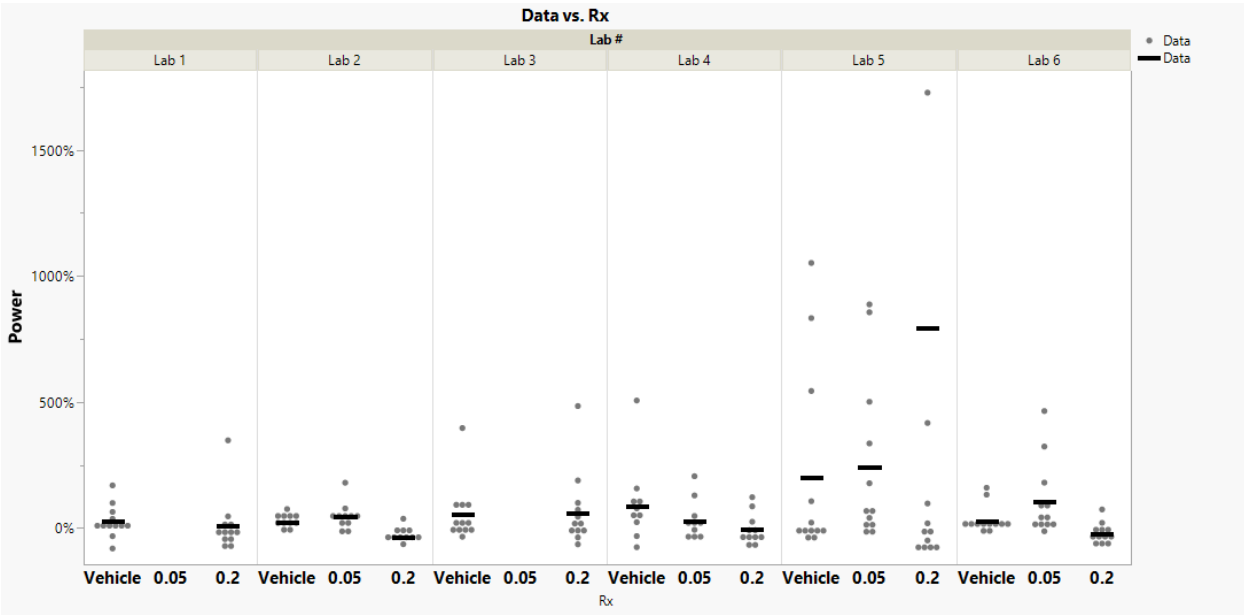

## Percent Change from Baseline using Absolute Theta-1 (4-5.9 Hz) Power

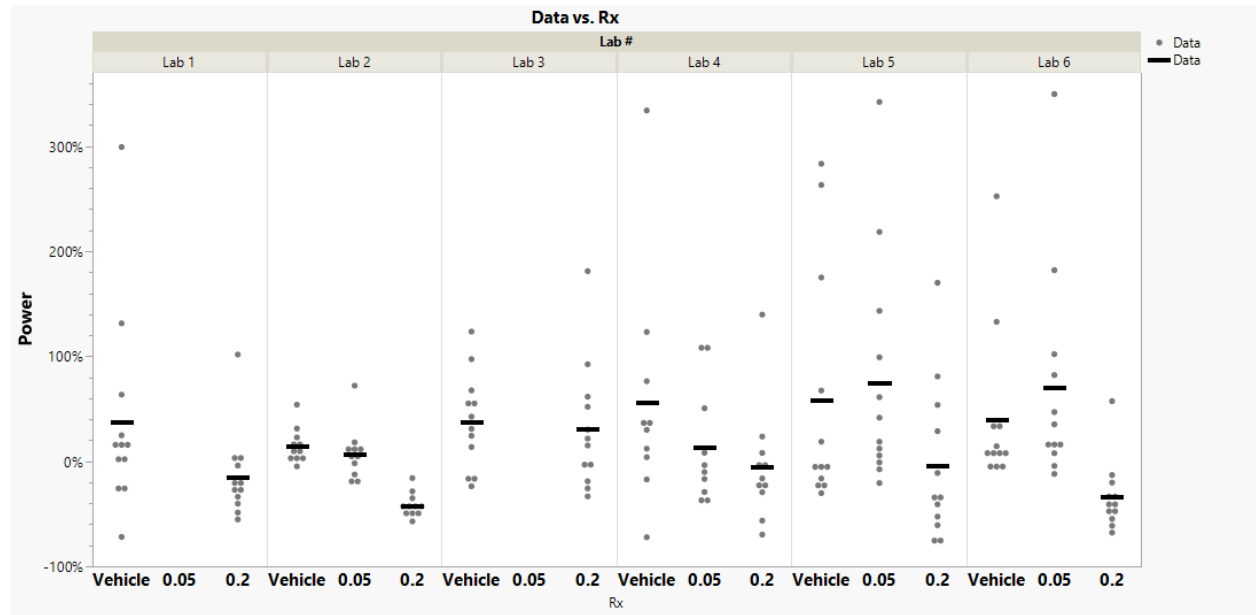

## Percent Change from Baseline using Absolute Theta-2 (6-7.9 Hz) Power

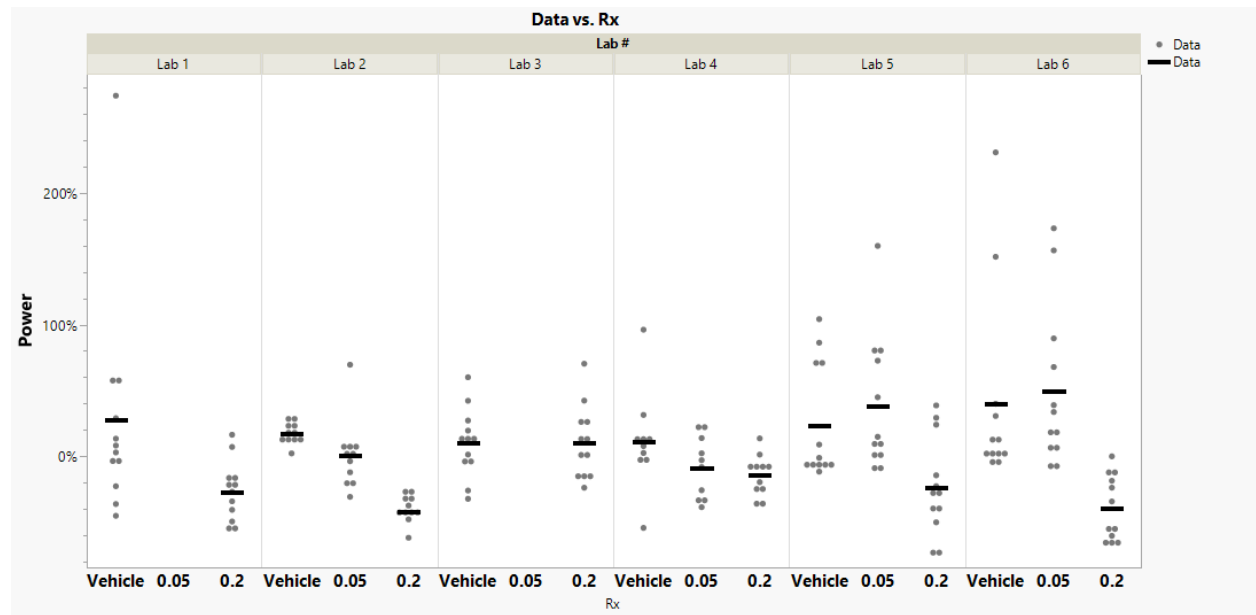

## Percent Change from Baseline using Absolute Alpha-1 (8-10.9 Hz) Power

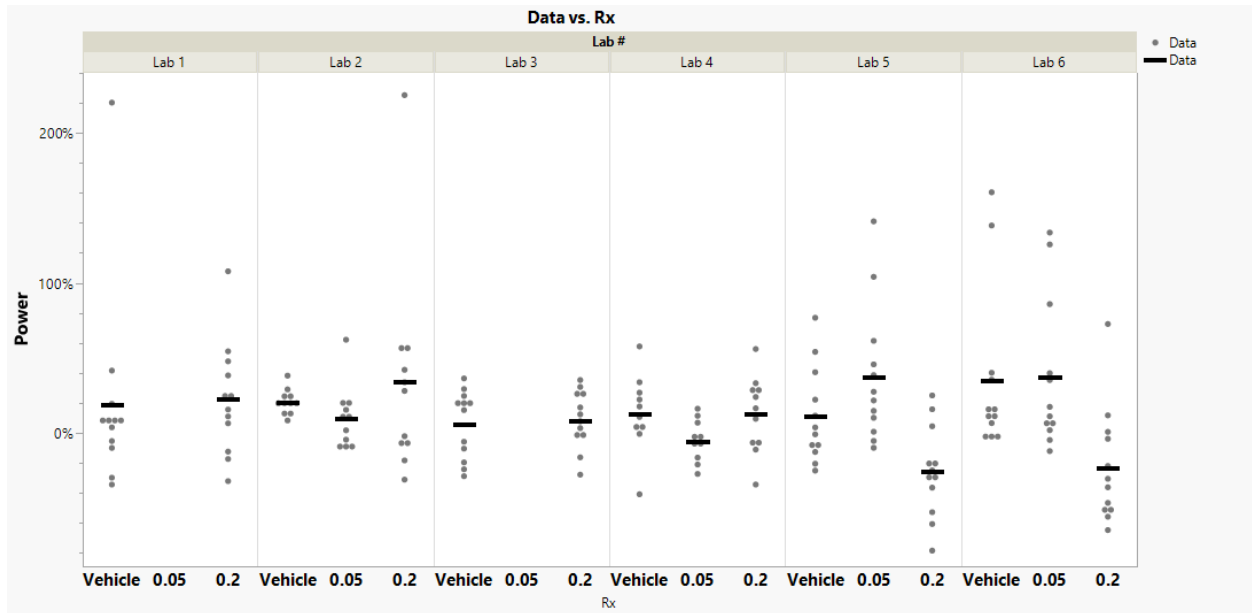

## Percent Change from Baseline using Absolute Alpha-2 (11-13.9 Hz) Power

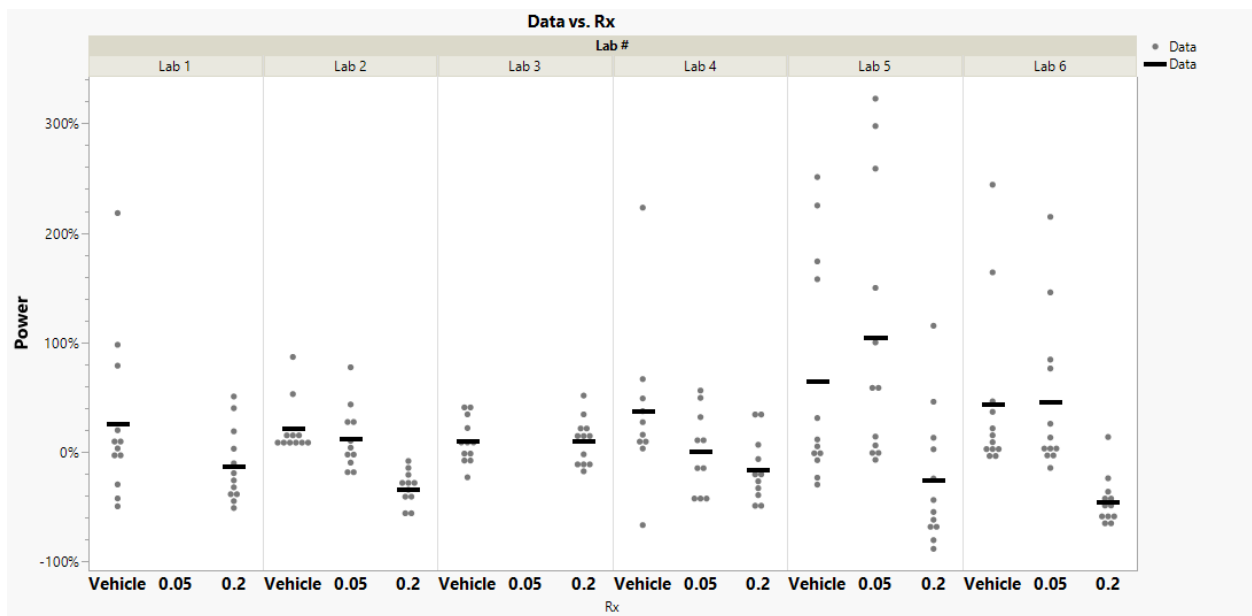

## Percent Change from Baseline using Absolute Beta-1 (14-17.9 Hz) Power

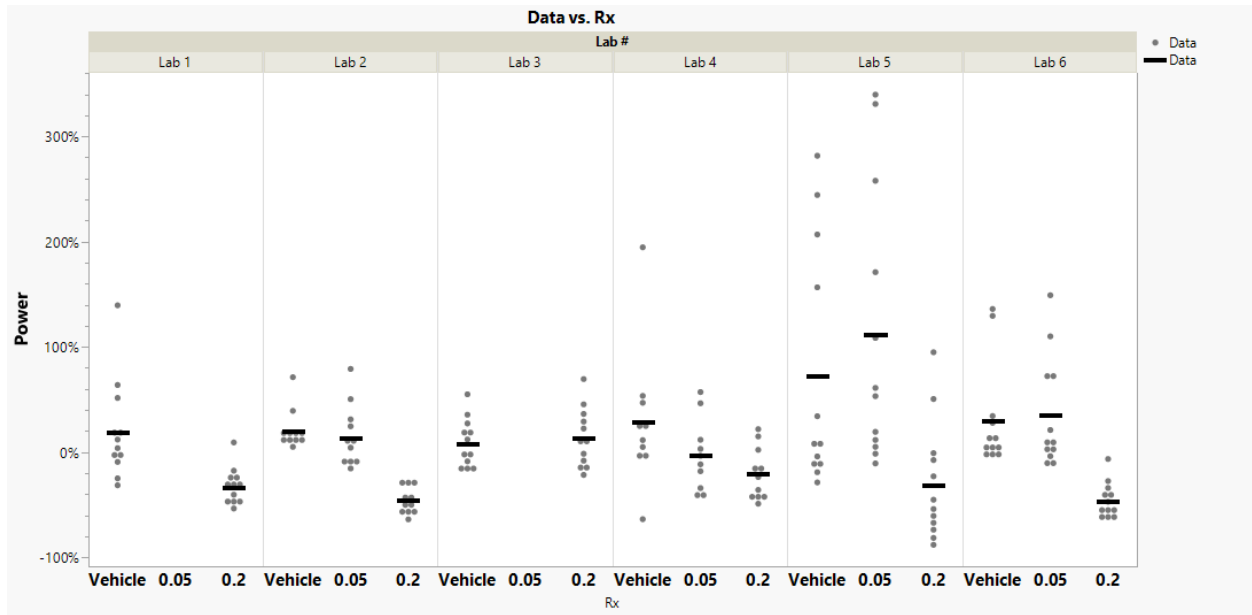

## Percent Change from Baseline using Absolute Beta-2 (18-31.9 Hz) Power

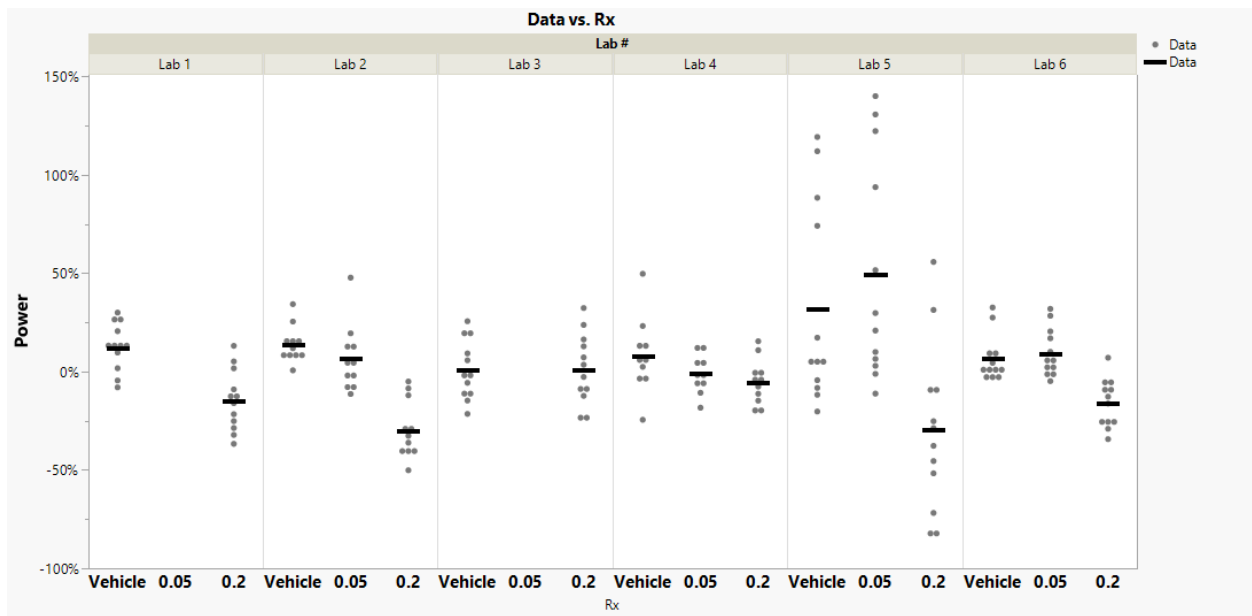

# Percent Change from Baseline using Absolute Gamma (32-48 Hz) Power

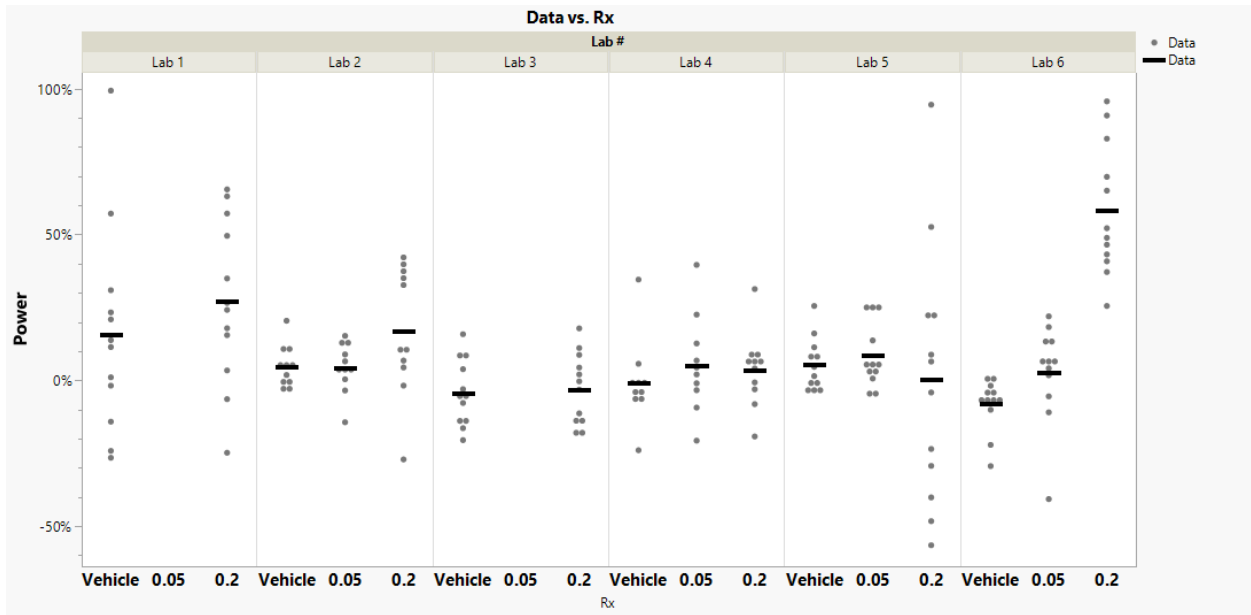

Supplement: pone.0309521.s012.pdf [file pone.0309521.s012.pdf]
