# Supplementary material for: Evaluation of variation in preclinical electroencephalographic (EEG) spectral power across multiple laboratories and experiments: An EQIPD study
Source: PubMed Central journal article supplement (PMC11521305; doi:10.1371/journal.pone.0309521), 2024-10-29
Supplement: pone.0309521.s001.pdf [file pone.0309521.s001.pdf]

## S1 Table: Localisation

| EXPERIMENTAL FACTOR                            | RESEARCH PARTNERS                                            |                                                                            |                                                                  |                                                              |                                                                    |                                         |
|------------------------------------------------|--------------------------------------------------------------|----------------------------------------------------------------------------|------------------------------------------------------------------|--------------------------------------------------------------|--------------------------------------------------------------------|-----------------------------------------|
|                                                | Lab 1                                                        | Lab 2                                                                      | Lab 3                                                            | Lab 4                                                        | Lab 5                                                              | Lab 6                                   |
| ANIMALS                                        |                                                              |                                                                            |                                                                  |                                                              |                                                                    |                                         |
| Species                                        | Mouse                                                        | Mouse                                                                      | Mouse                                                            | Mouse                                                        | Mouse                                                              | Participated only in Ring Testing Phase |
| Strain                                         | rTg4510                                                      | rTg4510                                                                    | rTg4510                                                          | rTg4510                                                      | rTg4510                                                            |                                         |
| Sex                                            | Female                                                       | Female                                                                     | Female                                                           | Female                                                       | Female                                                             |                                         |
| Age (at evaluation)                            | ~22 weeks                                                    | 20-21 weeks                                                                | ~23 weeks                                                        | 22-23 weeks                                                  | 22 weeks                                                           |                                         |
| Weight (at evaluation)                         | Average: 26.4 g;<br>Range: 23.4 – 30.4 g                     | Average: 26.31 g;<br>Range: 20.9 – 41.5 g                                  | Not available                                                    | 21 – 34 g                                                    | Average: 27.7 g;<br>Range: 21.1 – 32.2 g                           |                                         |
| Source                                         | Jackson Laboratories, Bar Harbor, USA                        | Jackson Laboratories, Bar Harbor, USA                                      | Jackson Laboratories, Bar Harbor, USA                            | Jackson Laboratories, Bar Harbor, USA                        | In-house, breeding pair from Jackson Laboratories, Bar Harbor, USA |                                         |
| SPF                                            | Yes                                                          | Yes                                                                        | Yes                                                              | Yes                                                          | No                                                                 |                                         |
| Paradigm naïve                                 | Yes                                                          | Yes                                                                        | Yes                                                              | Yes                                                          | Yes                                                                |                                         |
| Drug naïve                                     | Yes                                                          | Yes                                                                        | Yes                                                              | Yes                                                          | Yes                                                                |                                         |
| Previous procedures                            | None                                                         | None                                                                       | None                                                             | None                                                         | None                                                               |                                         |
| ANIMAL HUSBANDRY                               |                                                              |                                                                            |                                                                  |                                                              |                                                                    |                                         |
| Single/social housing (number of animals/cage) | Group-housed (n=5/cage) before surgery, single after surgery | Group-housed (n=4 - 5/cage) before surgery, single after surgery           | Group-housed (n=5 - 6/cage) before surgery, single after surgery | Group-housed (n=4/cage) before surgery, single after surgery | Group-housed (n=3/cage)                                            |                                         |
| Food                                           | Standard Chow                                                | Pellet (GLP Vitamin fortified, Provimi Kliba AG, Kaiseraugst, Switzerland) | Ssniff standard chow pelleted food                               | Standard laboratory chow SAFE                                | Altromin Chow                                                      |                                         |
| Drink                                          | Tap water                                                    | Tap water                                                                  | Tap water                                                        | Tap water                                                    | Tap water                                                          |                                         |
| Feeding schedule (restricted/ad libitum)       | ad libitum                                                   | ad libitum                                                                 | ad libitum                                                       | ad libitum                                                   | ad libitum                                                         |                                         |
| Light-dark cycle (transition period)           | 12h:12h (7am:7pm)                                            | 12h:12h (6am:6pm), 30 min transitions                                      | 12h:12h (5:15am:5:15pm)                                          | 12h:12h (6am:6pm)                                            | 12h:12h (13:00-01:00)                                              |                                         |
| Light intensity                                | ~500 lux                                                     | 100-200 lux                                                                | <200 lux                                                         | n/a                                                          | 50-100 lux                                                         |                                         |
| Dark phase red light                           | No                                                           | No                                                                         | No                                                               | No                                                           | Yes                                                                |                                         |
| Temperature range                              | 21 ± 2 °C                                                    | 22 ± 2 °C                                                                  | 20 - 24 °C                                                       | 20 - 23 °C                                                   | 20 - 24 °C                                                         |                                         |
| Humidity range                                 | 55 ± 5%                                                      | 55 ± 10%                                                                   | 45 - 60%                                                         | 30 - 70%                                                     | 50 - 60%                                                           |                                         |

|                                                     |                                                    |                                                                            |                                                                                     |                                                          |                                                        |
|-----------------------------------------------------|----------------------------------------------------|----------------------------------------------------------------------------|-------------------------------------------------------------------------------------|----------------------------------------------------------|--------------------------------------------------------|
| Ambient Noise level (quiet, radio 12/7, radio 24/7) | Radio 12/7 (quiet during recording)                | Radio 12/7                                                                 | Quiet                                                                               | Quiet                                                    | Radio 24/7                                             |
| Home cage ventilation (IVC or conventional)         | Conventional                                       | IVC                                                                        | Conventional                                                                        | IVC                                                      | Conventional                                           |
| Cleaning frequency                                  | Weekly                                             | Weekly                                                                     | Weekly                                                                              | Weekly                                                   | Weekly                                                 |
| Handling method                                     | Tail handling                                      | Tail handling                                                              | Tail handling                                                                       | Scruff                                                   | Tail handling                                          |
| Handling frequency                                  | Once per week                                      | Once per Week; daily during experiment                                     | Twice per week                                                                      | Once per week                                            | Once per week                                          |
| Environmental enrichment type                       | Tubes, chew sticks                                 | Animal houses, nesting material, wood block                                | Animal houses, nesting material                                                     | Animal houses, nesting material, nylon bone              | Animal houses, nesting material, paper roll            |
| SURGERY                                             |                                                    |                                                                            |                                                                                     |                                                          |                                                        |
| Survival rate of surgery                            | 100 %                                              | 78 % (32/41)                                                               | 100 %                                                                               | 100 %                                                    | 100 %                                                  |
| Anaesthesia used (inhalation dose)                  | Isoflurane (induced: 4%; maintained: 2%)           | Isoflurane (1.5 - 4%)                                                      | Isoflurane (induced: 4%; maintained: 2%)                                            | Isoflurane (induced: 4%; maintained: 2%)                 | Isoflurane (1 - 3%)                                    |
| Local anaesthesia used (dose)                       | Bupivacaine (0.1ml, 0.5% solution)                 | Lidocaine (0.1ml, 2% solution)                                             | Bupivacaine (0.1ml, 0.5% solution)                                                  | None                                                     | Lidocaine (0.1ml, 20mg/ml)                             |
| Local anaesthesia used (route of administration)    | Topical                                            | Topical                                                                    | Subcutaneously                                                                      | None                                                     | Subcutaneously                                         |
| Analgesia used (dose)                               | Carprofen (0.3ml) and buprenorphine (0.15ml), s.c. | Meloxicam (4 mg/kg), s.c.                                                  | Meloxicam (1 mg/kg), s.c.                                                           | Carprofen (5 mg/kg) and buprenorphine (0.05 mg/kg), s.c. | Flunixin meglumine (0.4ml/100g), s.c.                  |
| Surgery duration per animal                         | ~40 mins                                           | 2-3 hrs                                                                    | ~80 mins                                                                            | 30 mins                                                  | 2 hrs                                                  |
| Post-surgery recovery duration                      | 2 weeks                                            | 1 - 2 weeks                                                                | 2 weeks                                                                             | 2 weeks                                                  | 2 weeks                                                |
| Surgical procedure used                             | Stereotaxic electrode implantation                 | Electrode placement by drilling in skull and s.c. placement of transmitter | Stereotaxic surface screw electrode implantation with s.c. placement of transmitter | Stereotaxic electrode implantation                       | Stereotaxic surgery with i.p. placement of transmitter |
| Fluids given during surgery                         | Saline (1 ml)                                      | No                                                                         | No                                                                                  | Yes                                                      | Saline (0.1 ml/h)                                      |
| Body temp maintained during surgery                 | Yes                                                | Yes                                                                        | Yes                                                                                 | Yes                                                      | Yes                                                    |
| EEG                                                 |                                                    |                                                                            |                                                                                     |                                                          |                                                        |
| Number of recording electrodes                      | 2                                                  | 1                                                                          | 2                                                                                   | 1                                                        | 1                                                      |
| Number of reference electrodes                      | 2                                                  | 1                                                                          | 2                                                                                   | 1                                                        | 1                                                      |
| Screw size or array weight/size                     | Screw: 0.8mm diameter / 24.5mg                     | Screw: 2.16 mm head diameter, 1.19 mm shaft diameter, 1.60 mm shaft length | M 1.2 x 2 [mm]; 1.2 mm diameter / 30 mg                                             | Screw: 0.25 cm length                                    | DSI wire loop                                          |

|                                                                  |                                          |                                 |                                   |                                              |                                                              |
|------------------------------------------------------------------|------------------------------------------|---------------------------------|-----------------------------------|----------------------------------------------|--------------------------------------------------------------|
| Cementing agent                                                  | CA glue, dental acrylic                  | PermaCem Automix                | Dental acrylic (Paladur®)         | Methyl methacrylate                          | UV activated dental cement (RelyX Unicem Apicap (shade: A1)) |
| Recording system (tethered/telemetry)                            | Wireless: stored on device               | Telemetry: DSI (HD-X02)         | Telemetry: DSI (HD-X02)           | Tethered: Pinnacle Technology Inc. (8401-HS) | Telemetry: DSI (FT20)                                        |
| Recording software (version)                                     | N/A (data recorded directly onto device) | Ponemah (DSI, v. 6.41)          | Ponemah (DSI, v. 5.2.0)           | Sirenia (Pinnacle Technology, v. 2)          | Dataquest ART (DSI)                                          |
| Sampling Rate                                                    | 200 Hz                                   | 500 Hz                          | 1000 Hz (Batch1), 500 Hz (Batch2) | 1 kHz                                        | 1000 Hz                                                      |
| Sampling Filters                                                 | None                                     | None                            | 1.5 - 80 Hz                       | 0.5 Hz - 1 kHz                               | None                                                         |
| Sampling Gain                                                    | 2 mV                                     | Not specified by manufacturer   | Not specified by manufacturer     | 10 x                                         | Not specified by manufacturer                                |
| STUDY                                                            |                                          |                                 |                                   |                                              |                                                              |
| Recording environment (home cage/cylinder)                       | Phenotypic homecages                     | Recording cage                  | New cage                          | Cylinder                                     | Home cage                                                    |
| Single/social housing (number of animals/cage) during recordings | Single                                   | Single                          | Single                            | Single                                       | Single                                                       |
| Test duration                                                    | 96 hrs                                   | 72 hrs                          | 72 hrs                            | 48 hrs                                       | 72 hrs                                                       |
| Sample size rationale used                                       | Power calculation                        | Based on historical data        | Power calculation                 | Based on historical data                     | Based on historical data                                     |
| Randomisation to test group method                               | None                                     | R-script by WP5                 | None                              | None                                         | WP5 script by WP5                                            |
| Was experimenter blinded                                         | No                                       | No                              | No                                | No                                           | Yes                                                          |
| ANALYSIS                                                         |                                          |                                 |                                   |                                              |                                                              |
| Analysis software                                                | Matlab                                   | Neuroscore (DSI, v. 3.3.9317-1) | Neuroscore (DSI)                  | Neuroscore (DSI)                             | Neuroscore (DSI, v. 3.3.9317-1)                              |
| Was a log transform used?                                        | Yes                                      | No                              | No                                | No                                           | No                                                           |
| Windowing method                                                 | Hanning                                  | Hamming                         | Hamming                           | Hamming                                      | Hamming                                                      |
| Epoch size                                                       | 4 sec                                    | 10 sec                          | 5 min                             | 10 sec                                       | 10 sec                                                       |
| Filters used (incl. cut-off frequencies)                         | Bandpass (0.75 - 48 Hz)                  | None                            | None                              | Bandpass (0.5 Hz - 1 kHz)                    | Lowpass 250 Hz                                               |

|                                                                                                                                                        |                                                                                                                                                                                                                                                                                                               |                                                                                                                                                                                                                                                                                                                                                                                                                                                                                                    |                                                                                                                                                                                                                                                                                                                                                                                                         |                                                                                                                                                                                                                                                                                    |                                                                                                                                                                                                                                            |  |
|--------------------------------------------------------------------------------------------------------------------------------------------------------|---------------------------------------------------------------------------------------------------------------------------------------------------------------------------------------------------------------------------------------------------------------------------------------------------------------|----------------------------------------------------------------------------------------------------------------------------------------------------------------------------------------------------------------------------------------------------------------------------------------------------------------------------------------------------------------------------------------------------------------------------------------------------------------------------------------------------|---------------------------------------------------------------------------------------------------------------------------------------------------------------------------------------------------------------------------------------------------------------------------------------------------------------------------------------------------------------------------------------------------------|------------------------------------------------------------------------------------------------------------------------------------------------------------------------------------------------------------------------------------------------------------------------------------|--------------------------------------------------------------------------------------------------------------------------------------------------------------------------------------------------------------------------------------------|--|
| <p>Describe briefly the performance of localised analysis in a few sentences (artifact removal, normalization, calculation of relative power etc.)</p> | <p>Data were bandpass filtered, epoched and artifacts rejected semi-automatically. Spectra calculated via autoregressive modelling. Absolute and relative band powers averaged over hourly bins. Epochs also sleep scored based off accelerometer movement (sleep/wake) and delta/theta ratio (NREM/REM).</p> | <p>Raw data was imported into NeuroScore and 72h of recording were selected per animal after visual inspection of the signal quality. Artifacts were removed manually based on amplitude +-exceeding 200 microvolts or flat/drifted signal and removed from power spectral analysis. The power spectra per 10s epoch were exported to Excel with total power and power values per frequency band. Relative power per 10 sec epoch was Normalized to total power and was aggregated in 1h bins.</p> | <p>For batch 1, data were reduced from 1000 Hz to 500 Hz. Absolute and relative band powers were averaged for each 1-hour time bin over the 72-hour period and compared between wildtype and transgenic mice. Artifact analysis was performed on signals with a 500 Hz sampling rate by applying an amplitude detector. All epochs with the signal's amplitude over 1 mV were considered artifacts.</p> | <p>Manual artifact removal based on signal amplitude; Power spectral density plots consisting of standardized frequency band subdivisions were created for each 10 second bin and averaged for each 1 hour epoch for the recording and represented as a mean and SEM by group.</p> | <p>Manual artifact removal based on signal amplitude &gt;200mV and signal drift or loss, data were filtered low-pass 250Hz and relative power was Normalized to total power. Power band values were exported directly from NeuroScore.</p> |  |
| <p>Exclusion of animals: number and reason</p>                                                                                                         | <p>n=5: EEG signal contaminated by artifacts</p>                                                                                                                                                                                                                                                              | <p>n= 5: low signal quality; n= 3 excessive artifacts; n= 1 low signal amplitude</p>                                                                                                                                                                                                                                                                                                                                                                                                               | <p>n= 3: chewed tail; n= 4: excessive body weight loss; n= 1: poor wound healing</p>                                                                                                                                                                                                                                                                                                                    | <p>None</p>                                                                                                                                                                                                                                                                        | <p>None</p>                                                                                                                                                                                                                                |  |

**S1 Table. Experimental parameters across laboratories during the Localisation Phase.** The table provides information regarding animals and the facility, husbandry and housing, surgical procedures and care, EEG recording conditions and parameters, hardware and software, data analysis methods and experimental procedures.
