# Supplementary material for: Evaluation of variation in preclinical electroencephalographic (EEG) spectral power across multiple laboratories and experiments: An EQIPD study
Source: PubMed Central journal article supplement (PMC11521305; doi:10.1371/journal.pone.0309521), 2024-10-29
Supplement: pone.0309521.s003.pdf [file pone.0309521.s003.pdf]

## S3 Table: Ring-Testing

| EXPERIMENTAL FACTOR                                 | RESEARCH PARTNERS                                    |                                                                            |                                                            |                                                      |                                                            |                                             |
|-----------------------------------------------------|------------------------------------------------------|----------------------------------------------------------------------------|------------------------------------------------------------|------------------------------------------------------|------------------------------------------------------------|---------------------------------------------|
|                                                     | Lab 1                                                | Lab 2                                                                      | Lab 3                                                      | Lab 4                                                | Lab 5                                                      | Lab 6                                       |
| ANIMALS                                             |                                                      |                                                                            |                                                            |                                                      |                                                            |                                             |
| Species                                             | Mouse                                                | Mus musculus                                                               | Mouse                                                      | Mouse                                                | Mouse                                                      | Mouse                                       |
| Strain                                              | C57BL/6J                                             | C57BL/6JRj                                                                 | C57BL/6J                                                   | C57BL/6J                                             | C57BL/6J-CR                                                | C57BL/6JRj                                  |
| Sex                                                 | Female                                               | Female                                                                     | Female                                                     | Female                                               | Female                                                     | Female                                      |
| Age (at evaluation)                                 | 12-14 weeks                                          | 14 weeks                                                                   | 12-14 weeks                                                | 12-14 weeks                                          | 13-14 weeks                                                | 12-14 weeks                                 |
| Weight (at evaluation)                              | Average: 24.0 g;<br>Range: 22.1 - 25.7 g             | Average: 23.3 g;<br>Range: 22.2 - 24.95 g                                  | Average: 24.9 g;<br>Range: 24.0 - 25.9 g                   | Range: 18 - 23 g                                     | Average: 21.75 g,<br>Range: 19.3 - 25.6 g                  | Average: 22.54 g;<br>Range: 20.6g - 25.96 g |
| Source                                              | Charles River facility UK                            | Janvier Labs                                                               | Charles River Laboratories                                 | Jackson Laboratories, Bar Harbor, USA                | Charles River Laboratories                                 | Janvier, France                             |
| SPF                                                 | Yes                                                  | Yes                                                                        | Yes                                                        | Yes                                                  | Yes                                                        | Yes                                         |
| Paradigm naive                                      | Yes                                                  | Yes                                                                        | Yes                                                        | Yes                                                  | Yes                                                        | Yes                                         |
| Drug naive                                          | Yes                                                  | Yes                                                                        | Yes                                                        | Yes                                                  | Yes                                                        | Yes                                         |
| Previous procedures                                 | None                                                 | None                                                                       | None                                                       | None                                                 | None                                                       | None                                        |
| ANIMAL HUSBANDRY                                    |                                                      |                                                                            |                                                            |                                                      |                                                            |                                             |
| Single/social housing (number of animals/cage)      | Group-housed (n=4/cage) before surgery, single after | Group-housed (n=4 - 5/cage) before surgery, single after                   | Group-housed (n=4/cage) before surgery, paired (n=2) after | Group-housed (n=4/cage) before surgery, single after | Group-housed (n=4/cage) before surgery, paired (n=2) after | Single housed                               |
| Food                                                | Standard Chow                                        | Pellet (GLP Vitamin fortified, Provimi Kliba AG, Kaiseraugst, Switzerland) | Ssniff standard chow                                       | Standard laboratory chow SAFE                        | Altromin Chow                                              | Standard laboratory chow SAFE               |
| Drink                                               | Tap water                                            | Tap water                                                                  | Tap water                                                  | Tap water                                            | Tap water                                                  | Tap water                                   |
| Feeding schedule (restricted/ad libitum)            | ad libitum                                           | ad libitum                                                                 | ad libitum                                                 | ad libitum                                           | ad libitum                                                 | ad libitum                                  |
| Light-dark cycle                                    | 12h:12h (7am:7pm)                                    | 12h:12h (6am:6pm), 30 min transitions                                      | 12h:12h (5am:5pm)                                          | 12h:12h (6am:6pm)                                    | 12h:12h (09:00:21:00)                                      | 12h:12h (6am:6pm), gradual rise/fall        |
| Light intensity (in lux)                            | ~500 lux                                             | 100-200 lux                                                                | <200 lux                                                   | n/a                                                  | 50 - 100 lux                                               | 1000 lux                                    |
| Dark phase red light                                | No                                                   | No                                                                         | No                                                         | No                                                   | Yes                                                        | Yes                                         |
| Temperature range                                   | 21 ± 2 °C                                            | 22 ± 2 °C                                                                  | 20 - 24 °C                                                 | 20 - 23 °C                                           | 20 - 24 °C                                                 | 20 - 22 °C                                  |
| Humidity range                                      | 55 ± 5%                                              | 55 ± 10%                                                                   | 45 - 60%                                                   | 30 - 70%                                             | 50 - 60%                                                   | 45 - 50%                                    |
| Ambient Noise level (quiet, radio 12/7, radio 24/7) | Radio 12/7 (quiet during recording)                  | Radio 12/7                                                                 | Quiet                                                      | Quiet                                                | Radio 24/7                                                 | Radio 24/7                                  |

|                                                  |                                                    |                                                                            |                                                                         |                                                          |                                              |                                              |
|--------------------------------------------------|----------------------------------------------------|----------------------------------------------------------------------------|-------------------------------------------------------------------------|----------------------------------------------------------|----------------------------------------------|----------------------------------------------|
| Home cage ventilation                            | Conventional                                       | IVC                                                                        | Conventional                                                            | IVC                                                      | Conventional                                 | IVC                                          |
| Cleaning frequency                               | Weekly                                             | Weekly                                                                     | Weekly                                                                  | Weekly                                                   | Weekly                                       | 1/2 weeks                                    |
| Handling method                                  | Tail handling                                      | Tail handling                                                              | Tail handling                                                           | Scruff or tail handling                                  | Tail handling                                | Tail handling                                |
| Handling frequency                               | Once per week                                      | Once per Week; daily during experiment                                     | Twice per week                                                          | Once per week                                            | Twice per week                               | Once per week                                |
| Environmental enrichment type                    | Tubes, chew sticks                                 | Animal houses, nesting material, wood block                                | Animal houses, nesting material, chew sticks                            | Animal houses, nesting material, nylon bone              | Animal houses, nesting material, paper roll  | Animal houses, nesting material              |
| SURGERY                                          |                                                    |                                                                            |                                                                         |                                                          |                                              |                                              |
| Survival rate of surgery                         | 100 %                                              | 70.6 % (12/17)                                                             | 100 %                                                                   | 100 %                                                    | 100 %                                        | 100 %                                        |
| Anaesthesia used (dose)                          | Isoflurane (induced: 4%; maintained: 2%)           | Isoflurane (1.5 - 4%)                                                      | Isoflurane (induced: 4%; maintained: 1.5 - 2%)                          | Isoflurane (1.5 - 4%)                                    | Isoflurane (induced: 5%; maintained: 1 - 2%) | Isoflurane (induced: 5%; maintained: 1 - 2%) |
| Local anaesthesia used (dose)                    | Bupivacaine (0.1ml, 0.5% solution)                 | Lidocaine (0.1ml, 2% solution)                                             | Bupivacaine (0.1ml, 0.5% solution)                                      | None                                                     | Lidocaine (0.1ml, 2% solution)               | Xylocaine topical                            |
| Local anaesthesia used (route of administration) | Topical                                            | Topical                                                                    | Subcutaneously                                                          | None                                                     | Subcutaneously                               | Topical                                      |
| Analgesia used (dose)                            | Carprofen (0.3ml) and buprenorphine (0.15ml), s.c. | Meloxicam (4 mg/kg), s.c.                                                  | Meloxicam (1 mg/kg), s.c.                                               | Carprofen (5 mg/kg) and buprenorphine (0.05 mg/kg), s.c. | Carprofen (5 mg/kg), s.c.                    | Piritramide (0.25 mg/kg), s.c.               |
| Surgery duration per animal                      | ~40 mins                                           | 2-3 hrs                                                                    | ~80 mins                                                                | 30 mins                                                  | 1 - 2 hrs                                    | ~1 hr                                        |
| Post-surgery recovery duration                   | 2 weeks                                            | 10-21 days                                                                 | 2 weeks                                                                 | 2 weeks                                                  | 2 weeks                                      | ≥10 days                                     |
| Surgical procedure used                          | Stereotaxic electrode implantation                 | Electrode placement by drilling in skull and i.p. placement of transmitter | Stereotaxic surface screw electrode implantation with s.c. implantation | Stereotaxic electrode implantation                       | Stereotaxic electrode implantation           | Stereotaxic electrode implantation           |
| Fluids given during surgery                      | Saline (1 ml)                                      | Saline (0.1 ml/h)                                                          | No                                                                      | Yes                                                      | Yes                                          | No                                           |
| Body temp maintained during surgery              | Yes                                                | Yes                                                                        | Yes                                                                     | Yes                                                      | Yes                                          | Yes                                          |
| EEG                                              |                                                    |                                                                            |                                                                         |                                                          |                                              |                                              |
| Number of recording electrodes                   | 3                                                  | 1                                                                          | 2                                                                       | 1                                                        | 2                                            | 2 epidural                                   |
| Number of reference electrodes                   | 2                                                  | 1                                                                          | 2                                                                       | 1                                                        | 1                                            | 1                                            |
| Screw size or array weight/size                  | Screw: 0.8mm diameter / 24.5mg                     | Screw: 2.16 mm head diameter, 1.19 mm shaft diameter, 1.60 mm shaft length | M 1.2 x 2 [mm]; 1.2 mm diameter / 30 mg                                 | Screw: 0.25 cm length                                    | DSI wire loop                                | Screw: 1 mm diameter                         |

|                                                                     |                                          |                                 |                               |                                              |                                              |                                             |
|---------------------------------------------------------------------|------------------------------------------|---------------------------------|-------------------------------|----------------------------------------------|----------------------------------------------|---------------------------------------------|
| Cementing agent                                                     | CA glue, dental acrylic                  | Permagem Automix                | Dental acrylic (Paladur)      | Methyl methacrylate                          | RelyXTM Unicem 2 Automix (3M ESPE, Germany)  | RelyXTM Unicem 2 Automix (3M ESPE, Germany) |
| Recording system (tethered/telemetry, include vendor + device type) | Wireless: stored on device               | Telemetry: DSI (HD-X02)         | Telemetry: DSI (HD-X02)       | Tethered: Pinnacle Technology Inc. (8401-HS) | Wireless: TaiNi (20/16/72/LOA, TaiNiTec LTD) | Tethered                                    |
| Recording software                                                  | N/A (data recorded directly onto device) | Ponemah (DSI, v. 6.41)          | Ponemah (DSI, v. 5.2.0)       | Sirenia (Pinnacle Technology, v. 2)          | TAINILIVE (TaiNiTec LTD)                     | Biosemi Active Two (Amsterdam, NL)          |
| Sampling Rate                                                       | 200 Hz                                   | 500 Hz                          | 1 kHz                         | 1 kHz                                        | 1 kHz                                        | 512 Hz                                      |
| Sampling Filters                                                    | None                                     | None                            | 1.5 - 80 Hz                   | 0.5 Hz - 1 kHz                               | None                                         | None                                        |
| Sampling Gain                                                       | 2 mV                                     | Not specified by manufacturer   | Not specified by manufacturer | 10 x                                         | Not specified by manufacturer                | Not specified by manufacturer               |
| STUDY                                                               |                                          |                                 |                               |                                              |                                              |                                             |
| Recording environment (home cage/cylinder)                          | Phenotyper homecages                     | Recording cage                  | New cage                      | Cylinder                                     | Home cage                                    | Home cage                                   |
| Single/social housing (number of animals/cage) during recordings    | Single                                   | Single                          | Single                        | Single                                       | Social housing (n=2)                         | Single                                      |
| Test duration                                                       | 5 hrs per recording day                  | 5 hrs per recording day         | 5 hrs per recording day       | 5 hrs per recording day                      | 5 hrs per recording day                      | 5 hrs per recording day                     |
| Sample size rationale used                                          | Power calculation                        | Based on historical data        | Power calculation             | Based on historical data                     | Based on historical data                     | Based on historical data                    |
| Randomisation to test group method                                  | Random number generator                  | Yes                             | Randomly; R-script            | Yes                                          | Yes                                          | Yes                                         |
| Blinding                                                            | No                                       | No                              | Yes                           | No                                           | Yes                                          | Yes                                         |
| ANALYSIS                                                            |                                          |                                 |                               |                                              |                                              |                                             |
| Analysis software                                                   | Matlab                                   | Neuroscore (DSI, v. 3.3.9317-1) | Neuroscore (DSI)              | Matlab                                       | Neuroscore (DSI, v. 3.3.9317-1)              | Custom                                      |
| Was a log transform used?                                           | Yes                                      | No                              | No                            | No                                           | No                                           | NO                                          |
| Windowing method                                                    | Hanning                                  | Hamming                         | Hamming                       | Welch periodogram, Hamming                   | Hamming                                      | Hanning                                     |
| Epoch size                                                          | 10 sec                                   | 10 sec                          | 10 sec                        | 10 sec                                       | 10 sec                                       | 4 sec (local), 10 sec (central)             |
| Filters used (specify which kind of filter and the order or dB)     | Bandpass (0.75 - 48 Hz)                  | None                            | None                          | Bandpass (0.5 Hz - 1 kHz)                    | Lowpass 250 Hz                               | Bessel (3rd order), high pass 0.5 Hz        |

|                                                                                                                                                 |                                                                                                                                                                                                                                                                                                                                                                                                                        |                                                                                                                                                                                                                                                                                                                                                                                                                                                             |                                                                                                                                                                                                                                                                                                                                                                                                                                                                                                                                                                                                                                                                                        |                                                                                                                                                                                                                                                                             |                                                                                                                                                                                                                                                                                                                                                                                                                                                                      |                                                                                                                                                                                                                                                                                                                                                                                                                            |
|-------------------------------------------------------------------------------------------------------------------------------------------------|------------------------------------------------------------------------------------------------------------------------------------------------------------------------------------------------------------------------------------------------------------------------------------------------------------------------------------------------------------------------------------------------------------------------|-------------------------------------------------------------------------------------------------------------------------------------------------------------------------------------------------------------------------------------------------------------------------------------------------------------------------------------------------------------------------------------------------------------------------------------------------------------|----------------------------------------------------------------------------------------------------------------------------------------------------------------------------------------------------------------------------------------------------------------------------------------------------------------------------------------------------------------------------------------------------------------------------------------------------------------------------------------------------------------------------------------------------------------------------------------------------------------------------------------------------------------------------------------|-----------------------------------------------------------------------------------------------------------------------------------------------------------------------------------------------------------------------------------------------------------------------------|----------------------------------------------------------------------------------------------------------------------------------------------------------------------------------------------------------------------------------------------------------------------------------------------------------------------------------------------------------------------------------------------------------------------------------------------------------------------|----------------------------------------------------------------------------------------------------------------------------------------------------------------------------------------------------------------------------------------------------------------------------------------------------------------------------------------------------------------------------------------------------------------------------|
| Describe briefly the performance of localised analysis in a few sentences (artifact removal, normalization, calculation of relative power etc.) | Data were bandpass filtered and epoched. Epochs containing artifacts were excluded semi automatically. Remaining epochs had power spectra derived via autoregressive methods. Total power was calculated for each epoch in the 0-45 Hz range. Average baseline band powers calculated for 30-60 minutes before dosing. Average band powers calculated for 30-60 minutes after dose. Spectra normalised to total power. | Raw data was imported into NeuroScore and 30 min. pre-dose and 30-60 min post-dose were selected per animal after visual inspection of the signal quality. The power spectra per 10s epoch were exported to Excel with total power and power values per frequency band. Relative gamma power (32-48Hz) per 10 sec epoch was normalized to total power and was aggregated in 30 min. bins. Artifacts were removed automatically based on an internal script. | Gamma power (32-48 Hz) for 30-60 minutes before and after the treatment, as well as the total power (0.5-48 Hz) for 30-60 minutes after the treatment were extracted with Neuroscore software. Artifact analysis was performed by applying an amplitude detector. All epochs with the signal's amplitude over 1 mV were considered artifacts. For each animal, the sum of absolute gamma power and absolute total power per 30-minute time point was calculated. Relative gamma power was calculated by dividing absolute gamma power 30-60 minutes post dose by absolute total power. Two-tailed paired t-tests were used for comparison between the vehicle and drug treated groups. | Manual artifact removal based on signal amplitude; Power spectral density plots consisting of standardized frequency band subdivisions were created for each 10 second bin and averaged for each 1-hour epoch for the recording and represented as a mean and SEM by group. | Raw data was imported into NeuroScore and 30 min. pre-dose and 30-60 min post-dose were selected per animal after visual inspection of the signal quality. The power spectra per 10s epoch were exported to Excel with total power and power values per frequency band. Relative gamma power per 10 sec epoch was normalized to total power and was aggregated in 30 min. bins. Artifacts were removed manually (epochs with artifacts were excluded from analysis). | Raw EEG signals were filtered between 1 - 100Hz, Bessel 3rd order and high-pass filter 0.5 Hz were applied. Artifacts detection and removal was performed automatically. Data analysis was performed as required by the protocol: signals were subjected to FFT, power was calculated for 10 sec epochs. Relative gamma power (32-48Hz) per 10 sec epoch was normalized to total power and was aggregated in 30 min. bins. |
|                                                                                                                                                 | Exclusion of animals: number and reason                                                                                                                                                                                                                                                                                                                                                                                | None                                                                                                                                                                                                                                                                                                                                                                                                                                                        | n= 1: poor signal quality                                                                                                                                                                                                                                                                                                                                                                                                                                                                                                                                                                                                                                                              | n= 1: stress-related behavior                                                                                                                                                                                                                                               | None                                                                                                                                                                                                                                                                                                                                                                                                                                                                 | None                                                                                                                                                                                                                                                                                                                                                                                                                       |
| <b>DRUG TESTING</b>                                                                                                                             |                                                                                                                                                                                                                                                                                                                                                                                                                        |                                                                                                                                                                                                                                                                                                                                                                                                                                                             |                                                                                                                                                                                                                                                                                                                                                                                                                                                                                                                                                                                                                                                                                        |                                                                                                                                                                                                                                                                             |                                                                                                                                                                                                                                                                                                                                                                                                                                                                      |                                                                                                                                                                                                                                                                                                                                                                                                                            |
| Compound                                                                                                                                        | MK-801                                                                                                                                                                                                                                                                                                                                                                                                                 | MK-801                                                                                                                                                                                                                                                                                                                                                                                                                                                      | MK-801                                                                                                                                                                                                                                                                                                                                                                                                                                                                                                                                                                                                                                                                                 | MK-801                                                                                                                                                                                                                                                                      | MK-801                                                                                                                                                                                                                                                                                                                                                                                                                                                               | MK-801                                                                                                                                                                                                                                                                                                                                                                                                                     |
| Dose (mg/kg), i.p.                                                                                                                              | 0.2                                                                                                                                                                                                                                                                                                                                                                                                                    | 0, 0.05, 0.2                                                                                                                                                                                                                                                                                                                                                                                                                                                | 0.2                                                                                                                                                                                                                                                                                                                                                                                                                                                                                                                                                                                                                                                                                    | 0, 0.05, 0.2, 0.8                                                                                                                                                                                                                                                           | 0, 0.05, 0.2                                                                                                                                                                                                                                                                                                                                                                                                                                                         | 0, 0.05, 0.2, 0.8                                                                                                                                                                                                                                                                                                                                                                                                          |
| Dosing regimen                                                                                                                                  | ZT2 on day 2 & 4                                                                                                                                                                                                                                                                                                                                                                                                       | Single dose i.p. 1h after the baseline recordings followed by 4h of the post-dosing recordings                                                                                                                                                                                                                                                                                                                                                              | ZT2 on day 2 & 5                                                                                                                                                                                                                                                                                                                                                                                                                                                                                                                                                                                                                                                                       | Single dose i.p. 1h after the baseline recordings followed by 4h of the post-dosing recordings                                                                                                                                                                              | Single dose i.p. 1h after the baseline recordings followed by 4h of the post-dosing recordings                                                                                                                                                                                                                                                                                                                                                                       | Single dose i.p. 1h after the baseline recordings followed by 4h of the post-dosing recordings                                                                                                                                                                                                                                                                                                                             |
| Time of dosing (ZT time)                                                                                                                        | 9am (ZT2)                                                                                                                                                                                                                                                                                                                                                                                                              | ZT3 - 3.5                                                                                                                                                                                                                                                                                                                                                                                                                                                   | ZT4                                                                                                                                                                                                                                                                                                                                                                                                                                                                                                                                                                                                                                                                                    | ZT3                                                                                                                                                                                                                                                                         | ZT3.5                                                                                                                                                                                                                                                                                                                                                                                                                                                                | ZT3.5                                                                                                                                                                                                                                                                                                                                                                                                                      |
| Vehicle                                                                                                                                         | Saline                                                                                                                                                                                                                                                                                                                                                                                                                 | Saline                                                                                                                                                                                                                                                                                                                                                                                                                                                      | Saline                                                                                                                                                                                                                                                                                                                                                                                                                                                                                                                                                                                                                                                                                 | Saline                                                                                                                                                                                                                                                                      | Saline                                                                                                                                                                                                                                                                                                                                                                                                                                                               | Saline                                                                                                                                                                                                                                                                                                                                                                                                                     |
| Vehicle volume (ml/kg)                                                                                                                          | 5                                                                                                                                                                                                                                                                                                                                                                                                                      | 10                                                                                                                                                                                                                                                                                                                                                                                                                                                          | 10                                                                                                                                                                                                                                                                                                                                                                                                                                                                                                                                                                                                                                                                                     | 5                                                                                                                                                                                                                                                                           | 10                                                                                                                                                                                                                                                                                                                                                                                                                                                                   | 10                                                                                                                                                                                                                                                                                                                                                                                                                         |
| Food restricted during experiment                                                                                                               | No                                                                                                                                                                                                                                                                                                                                                                                                                     | No                                                                                                                                                                                                                                                                                                                                                                                                                                                          | No                                                                                                                                                                                                                                                                                                                                                                                                                                                                                                                                                                                                                                                                                     | No                                                                                                                                                                                                                                                                          | No                                                                                                                                                                                                                                                                                                                                                                                                                                                                   | Yes                                                                                                                                                                                                                                                                                                                                                                                                                        |
| Water restricted during experiment                                                                                                              | No                                                                                                                                                                                                                                                                                                                                                                                                                     | No                                                                                                                                                                                                                                                                                                                                                                                                                                                          | No                                                                                                                                                                                                                                                                                                                                                                                                                                                                                                                                                                                                                                                                                     | No                                                                                                                                                                                                                                                                          | No                                                                                                                                                                                                                                                                                                                                                                                                                                                                   | No                                                                                                                                                                                                                                                                                                                                                                                                                         |

**S3 Table. Experimental parameters across laboratories during the Ring Testing Phase.** The table provides information regarding animals and the facility, husbandry and housing, surgical procedures and care, EEG recording conditions and parameters, hardware and software, data analysis methods and experimental procedures.
