# Supplementary material for: Evaluation of variation in preclinical electroencephalographic (EEG) spectral power across multiple laboratories and experiments: An EQIPD study
Source: PubMed Central journal article supplement (PMC11521305; doi:10.1371/journal.pone.0309521), 2024-10-29
Supplement: pone.0309521.s004.pdf [file pone.0309521.s004.pdf]

## S4 Table

| Contributor ID | Test group ID | mean  | SE     | lower CL | upper CL | p value |
|----------------|---------------|-------|--------|----------|----------|---------|
| Lab 1          | TG            | 3.18  | 0.0584 | 3.06     | 3.3      | -       |
| Lab 1          | WT            | 3.21  | 0.0666 | 3.07     | 3.35     | -       |
| Lab 1          | TG - WT       | -0.03 | 0.0886 | -0.22    | 0.15     | 0.7123  |
| Lab 2          | TG            | 5.44  | 0.0615 | 5.31     | 5.57     | -       |
| Lab 2          | WT            | 5.64  | 0.0589 | 5.51     | 5.76     | -       |
| Lab 2          | TG - WT       | -0.2  | 0.0851 | -0.38    | -0.02    | 0.0293  |
| Lab 3          | TG            | -5.36 | 0.0659 | -5.49    | -5.22    | -       |
| Lab 3          | WT            | -5.38 | 0.0606 | -5.51    | -5.25    | -       |
| Lab 3          | TG - WT       | 0.02  | 0.0896 | -0.16    | 0.21     | 0.7912  |
| Lab 4          | TG            | -0.55 | 0.0408 | -0.64    | -0.47    | -       |
| Lab 4          | WT            | -0.4  | 0.0376 | -0.48    | -0.32    | -       |
| Lab 4          | TG - WT       | -0.15 | 0.0555 | -0.27    | -0.04    | 0.011   |
| Lab 5          | TG            | -6.68 | 0.1506 | -6.99    | -6.37    | -       |
| Lab 5          | WT            | -6.64 | 0.1506 | -6.95    | -6.33    | -       |
| Lab 5          | TG - WT       | -0.03 | 0.213  | -0.47    | 0.4      | 0.8713  |

**S4 Table. Localisation phase total power analysed locally by the partners.** The table shows estimated means, standard error, lower confidence limit (CL), and upper confidence limit (CL) of WT and TG groups, as well as their contrasts (TG-WT). The p-value was derived from the statistical models run per laboratory on log<sub>10</sub> total power data. Note that p-values are not provided for individual means as this was not of interest in this study.
