# Supplementary material for: Evaluation of variation in preclinical electroencephalographic (EEG) spectral power across multiple laboratories and experiments: An EQIPD study
Source: PubMed Central journal article supplement (PMC11521305; doi:10.1371/journal.pone.0309521), 2024-10-29
Supplement: pone.0309521.s005.pdf [file pone.0309521.s005.pdf]

## S5 Table

| Contributor ID | Test group ID | mean  | SE     | lower CL | upper CL | p value   |
|----------------|---------------|-------|--------|----------|----------|-----------|
| Lab 1          | TG            | -0.54 | 0.0074 | -0.56    | -0.53    | -         |
| Lab 1          | WT            | -0.53 | 0.0084 | -0.55    | -0.52    | -         |
| Lab 1          | TG - WT       | -0.01 | 0.0112 | -0.03    | 0.01     | 0.4142    |
| Lab 2          | TG            | -0.59 | 0.0105 | -0.61    | -0.57    | -         |
| Lab 2          | WT            | -0.67 | 0.0101 | -0.69    | -0.65    | -         |
| Lab 2          | TG - WT       | 0.08  | 0.0146 | 0.05     | 0.11     | p < 0.001 |
| Lab 3          | TG            | -0.68 | 0.0149 | -0.71    | -0.65    | -         |
| Lab 3          | WT            | -0.7  | 0.0137 | -0.72    | -0.67    | -         |
| Lab 3          | TG - WT       | 0.02  | 0.0202 | -0.02    | 0.06     | 0.3747    |
| Lab 4          | TG            | -0.58 | 0.006  | -0.59    | -0.57    | -         |
| Lab 4          | WT            | -0.58 | 0.0056 | -0.59    | -0.57    | -         |
| Lab 4          | TG - WT       | 0     | 0.0082 | -0.02    | 0.02     | 0.938     |
| Lab 5          | TG            | -0.66 | 0.0291 | -0.72    | -0.6     | -         |
| Lab 5          | WT            | -0.7  | 0.0291 | -0.76    | -0.64    | -         |
| Lab 5          | TG - WT       | 0.04  | 0.0411 | -0.05    | 0.12     | 0.3995    |

**S5 Table. Localisation phase relative theta power analysed locally by the partners.** The table shows estimated means, standard error, lower confidence limit (CL), and upper confidence limit (CL) of WT and TG groups, as well as their contrasts (TG-WT). The p-value was derived from the statistical models run per laboratory on log10 relative theta power data. Note that p-values are not provided for individual means as this was not of interest in this study.
