# Supplementary material for: Evaluation of variation in preclinical electroencephalographic (EEG) spectral power across multiple laboratories and experiments: An EQIPD study
Source: PubMed Central journal article supplement (PMC11521305; doi:10.1371/journal.pone.0309521), 2024-10-29
Supplement: pone.0309521.s006.pdf [file pone.0309521.s006.pdf]

## S6 Table

| Contributor ID | Test group ID | mean  | SE     | lower CL | upper CL | p value |
|----------------|---------------|-------|--------|----------|----------|---------|
| Lab 1          | TG            | -1.04 | 0.1022 | -1.27    | -0.81    | -       |
| Lab 1          | WT            | -1.05 | 0.1209 | -1.32    | -0.78    | -       |
| Lab 1          | TG – WT       | 0.01  | 0.1583 | -0.35    | 0.36     | 0.9648  |
| Lab 2          | TG            | -0.7  | 0.0907 | -0.89    | -0.51    | -       |
| Lab 2          | WT            | -0.28 | 0.0907 | -0.47    | -0.09    | -       |
| Lab 2          | TG – WT       | -0.42 | 0.1283 | -0.69    | -0.15    | 0.005   |
| Lab 3          | TG            | -0.55 | 0.0506 | -0.65    | -0.44    | -       |
| Lab 3          | WT            | -0.31 | 0.0506 | -0.42    | -0.21    | -       |
| Lab 3          | TG – WT       | -0.23 | 0.0716 | -0.38    | -0.09    | 0.0035  |
| Lab 4          | TG            | -0.8  | 0.128  | -1.07    | -0.54    | -       |
| Lab 4          | WT            | -0.57 | 0.128  | -0.84    | -0.31    | -       |
| Lab 4          | TG – WT       | -0.23 | 0.181  | -0.6     | 0.15     | 0.2229  |
| Lab 5          | TG            | -0.87 | 0.1637 | -1.24    | -0.5     | -       |
| Lab 5          | WT            | -0.96 | 0.1494 | -1.3     | -0.63    | -       |
| Lab 5          | TG – WT       | 0.1   | 0.2217 | -0.4     | 0.6      | 0.6677  |

**S6 Table. Harmonisation phase total power analysed locally by the partners.** The table shows estimated means, standard error, lower confidence limit (CL), and upper confidence limit (CL) of WT and TG groups, as well as their contrasts (TG-WT). The p-value was derived from the statistical models run per laboratory on  $\log_{10}$  total power data. Note that p-values are not provided for individual means as this was not of interest in this study.
