# Supplementary material for: Evaluation of variation in preclinical electroencephalographic (EEG) spectral power across multiple laboratories and experiments: An EQIPD study
Source: PubMed Central journal article supplement (PMC11521305; doi:10.1371/journal.pone.0309521), 2024-10-29
Supplement: pone.0309521.s007.pdf [file pone.0309521.s007.pdf]

## S7 Table

| Contributor ID | Test group ID | mean  | SE     | lower CL | upper CL | p value |
|----------------|---------------|-------|--------|----------|----------|---------|
| Lab 1          | TG            | -0.62 | 0.0202 | -0.67    | -0.58    | -       |
| Lab 1          | WT            | -0.59 | 0.0239 | -0.64    | -0.53    | -       |
| Lab 1          | TG – WT       | -0.04 | 0.0313 | -0.11    | 0.03     | 0.2352  |
| Lab 2          | TG            | -0.66 | 0.0166 | -0.69    | -0.62    | -       |
| Lab 2          | WT            | -0.66 | 0.0166 | -0.7     | -0.63    | -       |
| Lab 2          | TG – WT       | 0     | 0.0235 | -0.05    | 0.05     | 0.8905  |
| Lab 3          | TG            | -0.68 | 0.0238 | -0.73    | -0.63    | -       |
| Lab 3          | WT            | -0.65 | 0.0238 | -0.7     | -0.6     | -       |
| Lab 3          | TG – WT       | -0.03 | 0.0336 | -0.1     | 0.04     | 0.39    |
| Lab 4          | TG            | -0.6  | 0.0213 | -0.65    | -0.56    | -       |
| Lab 4          | WT            | -0.55 | 0.0213 | -0.6     | -0.51    | -       |
| Lab 4          | TG – WT       | -0.05 | 0.0302 | -0.11    | 0.02     | 0.1339  |
| Lab 5          | TG            | -0.78 | 0.0544 | -0.9     | -0.66    | -       |
| Lab 5          | WT            | -0.83 | 0.0497 | -0.94    | -0.72    | -       |
| Lab 5          | TG – WT       | 0.05  | 0.0737 | -0.12    | 0.22     | 0.5128  |

**S7 Table. Harmonisation phase relative theta power analysed centrally. The**

table shows estimated means of WT and TG groups as well as their contrast, with each the standard error, lower confidence limit (CL), upper confidence limit (CL), and p-value derived from the statistical models run per laboratory on log<sub>10</sub> relative theta power data. Note that p-values are not provided for individual means as not of interest in this study.
