# Supplementary material for: Evaluation of variation in preclinical electroencephalographic (EEG) spectral power across multiple laboratories and experiments: An EQIPD study
Source: PubMed Central journal article supplement (PMC11521305; doi:10.1371/journal.pone.0309521), 2024-10-29
Supplement: pone.0309521.s008.pdf [file pone.0309521.s008.pdf]

## S8 Table

| Contributor ID | Test group ID                            | mean         | SE           | lower CL     | upper CL     | p value             |
|----------------|------------------------------------------|--------------|--------------|--------------|--------------|---------------------|
| Lab 1          | MK-801 0.2 mg/kg                         | -0.95        | 0.031        | -1.02        | -0.89        | -                   |
| Lab 1          | Vehicle                                  | -1.36        | 0.031        | -1.42        | -1.29        | -                   |
| <b>Lab 1</b>   | <b>Vehicle – (MK-801 0.2 mg/kg)</b>      | <b>-0.41</b> | <b>0.044</b> | <b>-0.5</b>  | <b>-0.32</b> | <b>p &lt; 0.001</b> |
| Lab 2          | (MK-801 0.05 mg/kg) – (MK-801 0.2 mg/kg) | -0.05        | 0.074        | -0.2         | 0.1          | 0.5293              |
| Lab 2          | MK-801 0.05 mg/kg                        | 0.62         | 0.052        | 0.51         | 0.73         | -                   |
| Lab 2          | MK-801 0.2 mg/kg                         | 0.67         | 0.052        | 0.56         | 0.77         | -                   |
| Lab 2          | Vehicle                                  | 0.62         | 0.052        | 0.51         | 0.73         | -                   |
| Lab 2          | Vehicle – (MK-801 0.05 mg/kg)            | 0            | 0.074        | -0.15        | 0.15         | 0.9934              |
| <b>Lab 2</b>   | <b>Vehicle – (MK-801 0.2 mg/kg)</b>      | <b>0.05</b>  | <b>0.074</b> | <b>-0.2</b>  | <b>0.1</b>   | <b>0.5239</b>       |
| Lab 3          | MK-801 0.2 mg/kg                         | 1.27         | 0.062        | -1.4         | -1.14        | -                   |
| Lab 3          | Vehicle                                  | 1.59         | 0.062        | -1.72        | -1.47        | -                   |
| <b>Lab 3</b>   | <b>Vehicle – (MK-801 0.2 mg/kg)</b>      | <b>0.33</b>  | <b>0.088</b> | <b>-0.51</b> | <b>-0.14</b> | <b>0.0011</b>       |
| Lab 4          | (MK-801 0.05 mg/kg) – (MK-801 0.2 mg/kg) | 0.02         | 0.054        | -0.13        | 0.09         | 0.6856              |
| Lab 4          | MK-801 0.05 mg/kg                        | 2.79         | 0.039        | -2.87        | -2.71        | -                   |
| Lab 4          | MK-801 0.2 mg/kg                         | 2.77         | 0.038        | -2.84        | -2.69        | -                   |
| Lab 4          | Vehicle                                  | 2.83         | 0.038        | -2.91        | -2.75        | -                   |
| Lab 4          | Vehicle – (MK-801 0.05 mg/kg)            | 0.04         | 0.054        | -0.15        | 0.07         | 0.4605              |
| <b>Lab 4</b>   | <b>Vehicle – (MK-801 0.2 mg/kg)</b>      | <b>0.06</b>  | <b>0.053</b> | <b>-0.17</b> | <b>0.05</b>  | <b>0.2455</b>       |
| Lab 5          | (MK-801 0.05 mg/kg) – (MK-801 0.2 mg/kg) | 0.25         | 0.046        | -0.35        | -0.16        | p < 0.001           |
| Lab 5          | MK-801 0.05 mg/kg                        | 1.72         | 0.033        | -1.79        | -1.66        | -                   |
| Lab 5          | MK-801 0.2 mg/kg                         | 1.47         | 0.033        | -1.54        | -1.4         | -                   |
| Lab 5          | Vehicle                                  | 1.66         | 0.033        | -1.73        | -1.6         | -                   |
| Lab 5          | Vehicle – (MK-801 0.05 mg/kg)            | 0.06         | 0.046        | -0.03        | 0.15         | 0.2077              |
| <b>Lab 5</b>   | <b>Vehicle – (MK-801 0.2 mg/kg)</b>      | <b>0.19</b>  | <b>0.046</b> | <b>-0.29</b> | <b>-0.1</b>  | <b>p &lt; 0.001</b> |
| Lab 6          | (MK-801 0.05 mg/kg) – (MK-801 0.2 mg/kg) | 0.17         | 0.06         | -0.3         | -0.05        | 0.0061              |
| Lab 6          | MK-801 0.05 mg/kg                        | 4.12         | 0.042        | -4.21        | -4.04        | -                   |
| Lab 6          | MK-801 0.2 mg/kg                         | 3.95         | 0.042        | -4.03        | -3.86        | -                   |

|              |                                     |                  |             |              |             |                         |
|--------------|-------------------------------------|------------------|-------------|--------------|-------------|-------------------------|
| Lab 6        | Vehicle                             | -<br>4.17        | 0.042       | -4.26        | -4.08       | -                       |
| Lab 6        | Vehicle – (MK-801 0.05 mg/kg)       | -<br>0.05        | 0.06        | -0.17        | 0.07        | 0.4258                  |
| <b>Lab 6</b> | <b>Vehicle – (MK-801 0.2 mg/kg)</b> | -<br><b>0.22</b> | <b>0.06</b> | <b>-0.34</b> | <b>-0.1</b> | <b>p &lt;<br/>0.001</b> |

**S8 Table. Ring-testing phase relative gamma power analysed locally by the partners.** The table shows estimated means, standard error, lower confidence limit (CL), and upper confidence limit (CL) of pharmacological interventions and their contrasts. The p-value was derived from the statistical models run per laboratory on log<sub>10</sub> relative gamma power data. Note that p-values are not provided for individual means as this was not of interest in this study.
