# Supplementary material for: Evaluation of variation in preclinical electroencephalographic (EEG) spectral power across multiple laboratories and experiments: An EQIPD study
Source: PubMed Central journal article supplement (PMC11521305; doi:10.1371/journal.pone.0309521), 2024-10-29
Supplement: pone.0309521.s009.pdf [file pone.0309521.s009.pdf]

## S9 Table

| Contributor ID | Test group ID                            | mean         | SE           | lower CL     | upper CL     | p value             |
|----------------|------------------------------------------|--------------|--------------|--------------|--------------|---------------------|
| Lab 1          | MK-801 0.2 mg/kg                         | 0.78         | 0.144        | 0.48         | 1.07         | -                   |
| Lab 1          | Vehicle                                  | -0.02        | 0.144        | -0.32        | 0.28         | -                   |
| <b>Lab 1</b>   | <b>Vehicle - (MK-801 0.2 mg/kg)</b>      | <b>-0.79</b> | <b>0.203</b> | <b>-1.21</b> | <b>-0.37</b> | <b>p &lt; 0.001</b> |
| Lab 2          | (MK-801 0.05 mg/kg) - (MK-801 0.2 mg/kg) | -0.14        | 0.071        | -0.29        | 0            | 0.0501              |
| Lab 2          | MK-801 0.05 mg/kg                        | -0.01        | 0.05         | -0.11        | 0.09         | -                   |
| Lab 2          | MK-801 0.2 mg/kg                         | 0.14         | 0.05         | 0.03         | 0.24         | -                   |
| Lab 2          | Vehicle                                  | 0.08         | 0.05         | -0.02        | 0.18         | -                   |
| Lab 2          | Vehicle - (MK-801 0.05 mg/kg)            | 0.09         | 0.071        | -0.06        | 0.23         | 0.2261              |
| <b>Lab 2</b>   | <b>Vehicle - (MK-801 0.2 mg/kg)</b>      | <b>-0.06</b> | <b>0.071</b> | <b>-0.2</b>  | <b>0.09</b>  | <b>0.427</b>        |
| Lab 3          | MK-801 0.2 mg/kg                         | 0.07         | 0.044        | -0.02        | 0.16         | -                   |
| Lab 3          | Vehicle                                  | -0.03        | 0.044        | -0.12        | 0.06         | -                   |
| <b>Lab 3</b>   | <b>Vehicle - (MK-801 0.2 mg/kg)</b>      | <b>-0.11</b> | <b>0.062</b> | <b>-0.23</b> | <b>0.02</b>  | <b>0.1011</b>       |
| Lab 4          | (MK-801 0.05 mg/kg) - (MK-801 0.2 mg/kg) | -0.08        | 0.104        | -0.29        | 0.14         | 0.4719              |
| Lab 4          | MK-801 0.05 mg/kg                        | 0.13         | 0.075        | -0.02        | 0.29         | -                   |
| Lab 4          | MK-801 0.2 mg/kg                         | 0.21         | 0.072        | 0.06         | 0.36         | -                   |
| Lab 4          | Vehicle                                  | -0.05        | 0.072        | -0.2         | 0.09         | -                   |
| Lab 4          | Vehicle - (MK-801 0.05 mg/kg)            | -0.19        | 0.104        | -0.4         | 0.03         | 0.0822              |
| <b>Lab 4</b>   | <b>Vehicle - (MK-801 0.2 mg/kg)</b>      | <b>-0.26</b> | <b>0.102</b> | <b>-0.47</b> | <b>-0.06</b> | <b>0.0148</b>       |
| Lab 5          | (MK-801 0.05 mg/kg) - (MK-801 0.2 mg/kg) | -0.63        | 0.181        | -1           | -0.27        | 0.0013              |
| Lab 5          | MK-801 0.05 mg/kg                        | -0.29        | 0.128        | -0.55        | -0.03        | -                   |
| Lab 5          | MK-801 0.2 mg/kg                         | 0.35         | 0.128        | 0.09         | 0.61         | -                   |
| Lab 5          | Vehicle                                  | -0.05        | 0.128        | -0.31        | 0.21         | -                   |
| Lab 5          | Vehicle - (MK-801 0.05 mg/kg)            | 0.24         | 0.181        | -0.13        | 0.6          | 0.2016              |
| <b>Lab 5</b>   | <b>Vehicle - (MK-801 0.2 mg/kg)</b>      | <b>-0.4</b>  | <b>0.181</b> | <b>-0.77</b> | <b>-0.03</b> | <b>0.0348</b>       |
| Lab 6          | (MK-801 0.05 mg/kg) - (MK-801 0.2 mg/kg) | -0.55        | 0.071        | -0.69        | -0.4         | p < 0.001           |
| Lab 6          | MK-801 0.05 mg/kg                        | 0.03         | 0.05         | -0.08        | 0.13         | -                   |
| Lab 6          | MK-801 0.2 mg/kg                         | 0.57         | 0.05         | 0.47         | 0.67         | -                   |
| Lab 6          | Vehicle                                  | -0.08        | 0.05         | -0.18        | 0.02         | -                   |
| Lab 6          | Vehicle - (MK-801 0.05 mg/kg)            | -0.11        | 0.071        | -0.25        | 0.04         | 0.1386              |
| <b>Lab 6</b>   | <b>Vehicle - (MK-801 0.2 mg/kg)</b>      | <b>-0.65</b> | <b>0.071</b> | <b>-0.8</b>  | <b>-0.51</b> | <b>p &lt; 0.001</b> |

**S9 Table. Ring-Testing phase gamma power as percent change from baseline using raw power analysed locally by the partners.** The table shows estimated means, standard error, lower confidence limit (CL), and upper confidence limit (CL) of pharmacological interventions and their contrasts. The p-value was derived from the statistical models run per laboratory on  $\log_{10}$  raw gamma power percent change data. Note that p-values are not provided for individual means as this was not of interest in this study.
