# Supplementary material for: Evaluation of variation in preclinical electroencephalographic (EEG) spectral power across multiple laboratories and experiments: An EQIPD study
Source: PubMed Central journal article supplement (PMC11521305; doi:10.1371/journal.pone.0309521), 2024-10-29
Supplement: pone.0309521.s010.pdf [file pone.0309521.s010.pdf]

# S10 Table

| Contributor ID | Test group ID                            | mean         | SE            | lower CL     | upper CL     | p value             |
|----------------|------------------------------------------|--------------|---------------|--------------|--------------|---------------------|
| Lab 1          | MK-801 0.2 mg/kg                         | -1.09        | 0.049         | -1.19        | -0.99        | -                   |
| Lab 1          | Vehicle                                  | -1.26        | 0.049         | -1.36        | -1.16        | -                   |
| <b>Lab 1</b>   | <b>Vehicle - (MK-801 0.2 mg/kg)</b>      | <b>-0.17</b> | <b>0.0693</b> | <b>-0.31</b> | <b>-0.03</b> | <b>0.0229</b>       |
| Lab 2          | (MK-801 0.05 mg/kg) - (MK-801 0.2 mg/kg) | -0.21        | 0.0456        | -0.3         | -0.12        | p < 0.001           |
| Lab 2          | MK-801 0.05 mg/kg                        | -1.57        | 0.0323        | -1.64        | -1.51        | -                   |
| Lab 2          | MK-801 0.2 mg/kg                         | -1.36        | 0.0323        | -1.43        | -1.3         | -                   |
| Lab 2          | Vehicle                                  | -1.62        | 0.0323        | -1.69        | -1.56        | -                   |
| Lab 2          | Vehicle - (MK-801 0.05 mg/kg)            | -0.05        | 0.0456        | -0.14        | 0.04         | 0.2802              |
| <b>Lab 2</b>   | <b>Vehicle - (MK-801 0.2 mg/kg)</b>      | <b>-0.26</b> | <b>0.0456</b> | <b>-0.35</b> | <b>-0.17</b> | <b>p &lt; 0.001</b> |
| Lab 3          | MK-801 0.2 mg/kg                         | -1.23        | 0.0264        | -1.29        | -1.18        | -                   |
| Lab 3          | Vehicle                                  | -1.26        | 0.0264        | -1.32        | -1.21        | -                   |
| <b>Lab 3</b>   | <b>Vehicle - (MK-801 0.2 mg/kg)</b>      | <b>-0.03</b> | <b>0.0374</b> | <b>-0.11</b> | <b>0.05</b>  | <b>0.4474</b>       |
| Lab 4          | (MK-801 0.05 mg/kg) - (MK-801 0.2 mg/kg) | -0.03        | 0.0933        | -0.22        | 0.16         | 0.7721              |
| Lab 4          | MK-801 0.05 mg/kg                        | -1.31        | 0.0675        | -1.45        | -1.17        | -                   |
| Lab 4          | MK-801 0.2 mg/kg                         | -1.28        | 0.0644        | -1.41        | -1.15        | -                   |
| Lab 4          | Vehicle                                  | -1.29        | 0.0675        | -1.42        | -1.15        | -                   |
| Lab 4          | Vehicle - (MK-801 0.05 mg/kg)            | 0.02         | 0.0955        | -0.17        | 0.22         | 0.8215              |
| <b>Lab 4</b>   | <b>Vehicle - (MK-801 0.2 mg/kg)</b>      | <b>-0.01</b> | <b>0.0933</b> | <b>-0.2</b>  | <b>0.19</b>  | <b>0.9531</b>       |
| Lab 5          | (MK-801 0.05 mg/kg) - (MK-801 0.2 mg/kg) | -0.24        | 0.0653        | -0.37        | -0.1         | 0.001               |
| Lab 5          | MK-801 0.05 mg/kg                        | -1.82        | 0.0462        | -1.92        | -1.73        | -                   |
| Lab 5          | MK-801 0.2 mg/kg                         | -1.59        | 0.0462        | -1.68        | -1.49        | -                   |
| Lab 5          | Vehicle                                  | -1.76        | 0.0462        | -1.85        | -1.66        | -                   |
| Lab 5          | Vehicle - (MK-801 0.05 mg/kg)            | 0.07         | 0.0653        | -0.06        | 0.2          | 0.2958              |
| <b>Lab 5</b>   | <b>Vehicle - (MK-801 0.2 mg/kg)</b>      | <b>-0.17</b> | <b>0.0653</b> | <b>-0.3</b>  | <b>-0.03</b> | <b>0.0154</b>       |
| Lab 6          | (MK-801 0.05 mg/kg) - (MK-801 0.2 mg/kg) | -0.46        | 0.089         | -0.64        | -0.28        | p < 0.001           |
| Lab 6          | MK-801 0.05 mg/kg                        | -1.39        | 0.063         | -1.51        | -1.26        | -                   |
| Lab 6          | MK-801 0.2 mg/kg                         | -0.93        | 0.063         | -1.05        | -0.8         | -                   |
| Lab 6          | Vehicle                                  | -1.35        | 0.063         | -1.48        | -1.23        | -                   |
| Lab 6          | Vehicle - (MK-801 0.05 mg/kg)            | 0.03         | 0.089         | -0.15        | 0.21         | 0.7267              |
| <b>Lab 6</b>   | <b>Vehicle - (MK-801 0.2 mg/kg)</b>      | <b>-0.43</b> | <b>0.089</b>  | <b>-0.61</b> | <b>-0.25</b> | <b>p &lt; 0.001</b> |

**S10 Table. Ring-testing phase relative gamma power analysed centrally.** The table shows estimated means, standard error, lower confidence limit (CL), and upper confidence limit (CL) of pharmacological interventions and their contrasts. The p-value was derived from the statistical models run per laboratory on  $\log_{10}$  relative gamma power data. Note that p-values are not provided for individual means as this was not of interest in this study.
