# Supplementary material for: Evaluation of variation in preclinical electroencephalographic (EEG) spectral power across multiple laboratories and experiments: An EQIPD study
Source: PubMed Central journal article supplement (PMC11521305; doi:10.1371/journal.pone.0309521), 2024-10-29
Supplement: pone.0309521.s011.pdf [file pone.0309521.s011.pdf]

# S11 Table

| Contributor ID | Test group ID                            | mean         | SE            | lower CL     | upper CL     | p value             |
|----------------|------------------------------------------|--------------|---------------|--------------|--------------|---------------------|
| Lab 1          | MK-801 0.2 mg/kg                         | 0.27         | 0.0926        | 0.08         | 0.46         | -                   |
| Lab 1          | Vehicle                                  | 0.16         | 0.0926        | -0.03        | 0.35         | -                   |
| <b>Lab 1</b>   | <b>Vehicle - (MK-801 0.2 mg/kg)</b>      | <b>-0.11</b> | <b>0.131</b>  | <b>-0.38</b> | <b>0.16</b>  | <b>0.398</b>        |
| Lab 2          | (MK-801 0.05 mg/kg) - (MK-801 0.2 mg/kg) | -0.12        | 0.0595        | -0.25        | 0            | 0.0461              |
| Lab 2          | MK-801 0.05 mg/kg                        | 0.04         | 0.0421        | -0.04        | 0.13         | -                   |
| Lab 2          | MK-801 0.2 mg/kg                         | 0.17         | 0.0421        | 0.08         | 0.25         | -                   |
| Lab 2          | Vehicle                                  | 0.05         | 0.0421        | -0.04        | 0.13         | -                   |
| Lab 2          | Vehicle - (MK-801 0.05 mg/kg)            | 0            | 0.0595        | -0.12        | 0.12         | 0.9624              |
| <b>Lab 2</b>   | <b>Vehicle - (MK-801 0.2 mg/kg)</b>      | <b>-0.12</b> | <b>0.0595</b> | <b>-0.24</b> | <b>0</b>     | <b>0.051</b>        |
| Lab 3          | MK-801 0.2 mg/kg                         | -0.03        | 0.0264        | -0.08        | 0.03         | -                   |
| Lab 3          | Vehicle                                  | -0.04        | 0.0274        | -0.1         | 0.01         | -                   |
| <b>Lab 3</b>   | <b>Vehicle - (MK-801 0.2 mg/kg)</b>      | <b>-0.02</b> | <b>0.0381</b> | <b>-0.1</b>  | <b>0.06</b>  | <b>0.6481</b>       |
| Lab 4          | (MK-801 0.05 mg/kg) - (MK-801 0.2 mg/kg) | 0.02         | 0.0641        | -0.11        | 0.15         | 0.7867              |
| Lab 4          | MK-801 0.05 mg/kg                        | 0.05         | 0.0464        | -0.04        | 0.15         | -                   |
| Lab 4          | MK-801 0.2 mg/kg                         | 0.03         | 0.0442        | -0.06        | 0.13         | -                   |
| Lab 4          | Vehicle                                  | -0.01        | 0.0464        | -0.1         | 0.09         | -                   |
| Lab 4          | Vehicle - (MK-801 0.05 mg/kg)            | -0.06        | 0.0656        | -0.19        | 0.07         | 0.3728              |
| <b>Lab 4</b>   | <b>Vehicle - (MK-801 0.2 mg/kg)</b>      | <b>-0.04</b> | <b>0.0641</b> | <b>-0.17</b> | <b>0.09</b>  | <b>0.5186</b>       |
| Lab 5          | (MK-801 0.05 mg/kg) - (MK-801 0.2 mg/kg) | 0.08         | 0.1092        | -0.14        | 0.3          | 0.4627              |
| Lab 5          | MK-801 0.05 mg/kg                        | 0.09         | 0.0772        | -0.07        | 0.24         | -                   |
| Lab 5          | MK-801 0.2 mg/kg                         | 0            | 0.0772        | -0.15        | 0.16         | -                   |
| Lab 5          | Vehicle                                  | 0.05         | 0.0772        | -0.1         | 0.21         | -                   |
| Lab 5          | Vehicle - (MK-801 0.05 mg/kg)            | -0.03        | 0.1092        | -0.25        | 0.19         | 0.7684              |
| <b>Lab 5</b>   | <b>Vehicle - (MK-801 0.2 mg/kg)</b>      | <b>0.05</b>  | <b>0.1092</b> | <b>-0.17</b> | <b>0.27</b>  | <b>0.6584</b>       |
| Lab 6          | (MK-801 0.05 mg/kg) - (MK-801 0.2 mg/kg) | -0.55        | 0.0691        | -0.69        | -0.41        | p < 0.001           |
| Lab 6          | MK-801 0.05 mg/kg                        | 0.03         | 0.0489        | -0.07        | 0.13         | -                   |
| Lab 6          | MK-801 0.2 mg/kg                         | 0.58         | 0.0489        | 0.48         | 0.68         | -                   |
| Lab 6          | Vehicle                                  | -0.08        | 0.0489        | -0.18        | 0.02         | -                   |
| Lab 6          | Vehicle - (MK-801 0.05 mg/kg)            | -0.11        | 0.0691        | -0.25        | 0.03         | 0.1241              |
| <b>Lab 6</b>   | <b>Vehicle - (MK-801 0.2 mg/kg)</b>      | <b>-0.66</b> | <b>0.0691</b> | <b>-0.8</b>  | <b>-0.52</b> | <b>p &lt; 0.001</b> |

**S11 Table. Ring-testing phase gamma power as percent change from baseline using raw power analysed centrally.** The table shows estimated means, standard error, lower confidence limit (CL), and upper confidence limit (CL) of pharmacological interventions and their contrasts. The p-value was derived from the statistical models run per laboratory on raw gamma power percent change data. Note that p-values are not provided for individual means as this was not of interest in this study.
